# Supplementary material for: Ciprofloxacin consumption and phenomenal transformation to a culturable nanometer-sized- bacterium by a Klebsiella strain SG01
Source: Research Square preprint supplement (doi:10.21203/rs.3.rs-5801647/v1), 2025-08-12
Supplement: Supplementary file 1 [file 72c69b910bd9b0e110bee50f.xlsx]

## Sheet: Transporters
Gene_IDs	T	C	log2FoldChange	pvalue	qvalue	T_normalized	C_normalized	Regulation	Significance	Gene_name	Product
PRL05_08210	4308	219	5.04435	0	0	11.6236	9.9593	UP	Yes	not available	MDR family MFS transporter
PRL05_13410	2971	180	4.79121	0	0	11.1055	9.49093	UP	Yes	glpT	glycerol-3-phosphate transporter
PRL05_00415	3048	203	4.65464	0	0	11.1529	9.56419	UP	Yes	not available	metal ABC transporter permease
PRL05_00400	10982	802	4.52173	0	0	13.0134	11.4419	UP	Yes	not available	metal ABC transporter substrate-binding protein
PRL05_00405	2881	278	4.11974	0	0	11.1192	9.64719	UP	Yes	not available	manganese/iron ABC transporter ATP-binding protein
PRL05_00410	1175	206	3.25828	0	0	9.92217	8.69026	UP	Yes	sitC	iron/manganese ABC transporter permease subunit SitC
PRL05_22245	431	113	2.6777	0	0	8.55281	7.52498	UP	Yes	malK	maltose/maltodextrin ABC transporter ATP-binding protein MalK
PRL05_12760	669	204	2.45977	0	0	9.22544	8.25384	UP	Yes	not available	PTS sugar transporter subunit IIA
PRL05_13700	1440	481	2.32829	0	0	10.3565	9.41754	UP	Yes	mglB	galactose/glucose ABC transporter substrate-binding protein MglB
PRL05_08800	1325	471	2.23852	0	0	10.2517	9.34455	UP	Yes	rbsB	ribose ABC transporter substrate-binding protein RbsB
PRL05_25325	989	368	2.1726	0	0	9.84047	8.95972	UP	Yes	not available	PTS lactose/cellobiose transporter subunit IIA
PRL05_07960	53	20	2.15232	9.74821e-10	2.60567e-09	5.56969	4.88259	UP	Yes	not available	ABC transporter ATP-binding protein
PRL05_17445	581	229	2.08952	0	0	9.08546	8.24275	UP	Yes	not available	MFS transporter
PRL05_21300	1410	558	2.08369	0	0	10.3693	9.51575	UP	Yes	not available	Nramp family divalent metal transporter
PRL05_05915	40	17	1.9808	5.11328e-07	1.16695e-06	5.18379	4.5818	UP	Yes	not available	PTS sugar transporter subunit IIA
PRL05_25320	136	59	1.95115	0	0	6.99822	6.26345	UP	Yes	not available	PTS sugar transporter subunit IIB
PRL05_01940	981	453	1.86107	0	0	9.88659	9.11655	UP	Yes	not available	sugar ABC transporter substrate-binding protein
PRL05_01375	97	46	1.82268	1.60205e-13	4.98437e-13	6.52784	5.8594	UP	Yes	not available	EamA family transporter
PRL05_00195	61	29	1.81909	5.12835e-09	1.32019e-08	5.84424	5.2239	UP	Yes	not available	PTS glucitol/sorbitol transporter subunit IIC
PRL05_19020	112	54	1.7988	3.9968e-15	1.31351e-14	6.74389	6.07119	UP	Yes	not available	PTS sugar transporter subunit IIA
PRL05_22240	505	248	1.77227	0	0	8.94279	8.21485	UP	Yes	malE	maltose/maltodextrin ABC transporter substrate-binding protein MalE
PRL05_00265	342	170	1.75479	0	0	8.38096	7.66853	UP	Yes	ascF	PTS cellobiose/arbutin/salicin transporter subunit IIBC
PRL05_01535	156	78	1.74633	0	0	7.23972	6.56218	UP	Yes	not available	MFS transporter
PRL05_04815	556	300	1.63645	0	0	9.10955	8.42911	UP	Yes	not available	cation-transporting P-type ATPase
PRL05_08790	556	304	1.61734	0	0	9.11347	8.44004	UP	Yes	rbsA	ribose ABC transporter ATP-binding protein RbsA
PRL05_21010	84	46	1.61509	3.22747e-10	8.82012e-10	6.35976	5.76681	UP	Yes	yjeM	glutamate/gamma-aminobutyrate family transporter YjeM
PRL05_23940	93	51	1.61306	3.85543e-11	1.09427e-10	6.50985	5.90942	UP	Yes	not available	PTS sugar transporter subunit IIA
PRL05_06265	65	36	1.59877	4.03906e-08	9.85898e-08	5.98533	5.42033	UP	Yes	phnE	phosphonate ABC transporter, permease protein PhnE
PRL05_02605	310	172	1.59619	0	0	8.27073	7.61741	UP	Yes	not available	transporter substrate-binding domain-containing protein
PRL05_13705	394	219	1.5936	0	0	8.61924	7.96097	UP	Yes	mglA	galactose/methyl galactoside ABC transporter ATP-binding protein MglA
PRL05_13705	394	219	1.5936	0	0	8.61924	7.96097	UP	Yes	mglA	galactose/methyl galactoside ABC transporter ATP-binding protein MglA
PRL05_21105	367	206	1.57947	0	0	8.51921	7.86766	UP	Yes	not available	peptidase domain-containing ABC transporter
PRL05_08335	24	14	1.52394	0.00129439	0.00220767	4.52046	4.1001	UP	Yes	phnV	2-aminoethylphosphonate ABC transport system, membrane component PhnV
PRL05_08500	541	318	1.51293	0	0	9.0958	8.46137	UP	Yes	not available	putative transporter
PRL05_25890	129	76	1.50963	1.30562e-13	4.08102e-13	7.01207	6.42382	UP	Yes	not available	MFS transporter
PRL05_22230	230	139	1.47288	0	0	7.86326	7.26294	UP	Yes	malG	maltose ABC transporter permease MalG
PRL05_13710	208	127	1.45809	0	0	7.72018	7.12849	UP	Yes	mglC	galactose/methyl galactoside ABC transporter permease MglC
PRL05_22965	66	41	1.43317	3.57946e-07	8.24612e-07	6.0451	5.52851	UP	Yes	not available	ABC transporter permease
PRL05_01280	83	52	1.42093	1.4254e-08	3.57515e-08	6.38521	5.85447	UP	Yes	not available	sugar porter family MFS transporter
PRL05_05535	196	123	1.41853	0	0	7.64231	7.06671	UP	Yes	ugpC	sn-glycerol-3-phosphate ABC transporter ATP-binding protein UgpC
PRL05_24170	46	29	1.41191	2.66316e-05	5.38245e-05	5.51649	5.04015	UP	Yes	not available	PTS glucitol/sorbitol transporter subunit IIB
PRL05_08395	187	119	1.39841	0	0	7.57806	7.01214	UP	Yes	not available	MFS transporter
PRL05_05505	25	16	1.39019	0.00221691	0.00368798	4.61438	4.21686	UP	Yes	not available	glucose PTS transporter subunit EIIB
PRL05_24650	244	159	1.36419	0	0	7.9727	7.41039	UP	Yes	not available	SulP family inorganic anion transporter
PRL05_09295	577	376	1.36417	0	0	9.22067	8.64177	UP	Yes	potD	spermidine/putrescine ABC transporter substrate-binding protein PotD
PRL05_26115	147	96	1.36104	2.94209e-13	9.05908e-13	7.23558	6.69221	UP	Yes	not available	CusA/CzcA family heavy metal efflux RND transporter
PRL05_01235	26	17	1.35931	0.0021711	0.00361794	4.6807	4.28488	UP	Yes	not available	sugar ABC transporter permease
PRL05_18825	68	45	1.34194	9.19388e-07	2.05799e-06	6.11034	5.61892	UP	Yes	pgtC	phosphoglycerate transport regulator PgtC
PRL05_11070	148	99	1.32643	7.23976e-13	2.18782e-12	7.25331	6.72158	UP	Yes	not available	sugar ABC transporter substrate-binding protein
PRL05_21745	1558	1054	1.31015	0	0	10.6685	10.1023	UP	Yes	fadL	long-chain fatty acid transporter FadL
PRL05_01870	841	576	1.29237	0	0	9.78146	9.22578	UP	Yes	not available	sugar porter family MFS transporter
PRL05_14595	52	36	1.27685	3.68813e-05	7.35982e-05	5.73038	5.28046	UP	Yes	not available	ABC transporter permease
PRL05_05530	78	54	1.27685	4.33702e-07	9.93803e-07	6.32749	5.84653	UP	Yes	not available	maltodextrin ABC transporter substrate-binding protein
PRL05_16650	669	478	1.23133	0	0	9.46418	8.93373	UP	Yes	not available	AI-2E family transporter
PRL05_13750	128	93	1.20717	6.07755e-10	1.64085e-09	7.06905	6.58466	UP	Yes	bglF	PTS beta-glucoside transporter subunit IIABC
PRL05_09870	60	44	1.19379	2.68288e-05	5.41823e-05	5.96178	5.52514	UP	Yes	not available	PTS fructose transporter subunit EIIC
PRL05_09890	45	34	1.15072	0.00041695	0.000752485	5.54828	5.14728	UP	Yes	not available	PTS fructose-like transporter subunit IIB
PRL05_05925	116	88	1.14488	1.67484e-08	4.18319e-08	6.94014	6.48145	UP	Yes	not available	PTS ascorbate transporter subunit IIC
PRL05_05525	43	33	1.1282	0.000687844	0.00121344	5.48688	5.09619	UP	Yes	not available	sugar ABC transporter permease
PRL05_20860	41	32	1.10388	0.00113162	0.00194957	5.42278	5.04306	UP	Yes	ulaA	PTS ascorbate transporter subunit IIC
PRL05_16925	111	89	1.06501	1.99272e-07	4.65865e-07	6.89517	6.46591	UP	Yes	malX	maltose/glucose-specific PTS transporter subunit IIBC
PRL05_10850	251	205	1.03839	1.90958e-14	6.14408e-14	8.08881	7.64512	UP	Yes	not available	ABC transporter permease
PRL05_13650	636	522	1.03131	0	0	9.437	8.98373	UP	Yes	fruA	PTS fructose transporter subunit IIBC
PRL05_20540	29	24	1.01935	0.0103941	0.0158976	4.9327	4.60696	UP	Yes	not available	PTS sugar transporter subunit IIB
	Table S9. This sheet presents differential gene expression data for genes annotated as transporters. Each row represents a single gene, identified by its Gene_ID, along with the corresponding Gene_name and Product description. Expression values are shown for both the treated (T) and control (C) conditions, with additional columns for normalized counts (T_normalized and C_normalized) to account fo…

## Sheet: cell division
Gene_IDs	T	C	log2FoldChange	pvalue	qvalue	T_normalized	C_normalized	Regulation	Significance	Gene_name	Product
PRL05_10175	5144	3428	1.33185	0	0	12.3882	11.8104	UP	Yes	ldtD	L,D-transpeptidase
PRL05_01700	14422	10305	1.23126	0	0	13.898	13.3583	UP	Yes	zapA	cell division protein ZapA
PRL05_07165	925	717	1.11381	0	0	9.95936	9.47149	UP	Yes	ftsE	cell division ATP-binding protein FtsE
PRL05_09440	933	947	0.724844	0	0	10.0652	9.72989	UP	Yes*	yceG	cell division protein YceG
PRL05_11415	448	461	0.705063	2.44471e-13	7.53622e-13	9.00989	8.68645	UP	Yes*	minC	septum site-determining protein MinC
PRL05_19845	106	110	0.692892	0.000453488	0.00081473	6.92313	6.62671	UP	Yes*	cedA	cell division activator CedA
PRL05_02130	1413	1530	0.631561	0	0	10.6881	10.3888	UP	Yes*	ftsP	cell division protein FtsP
PRL05_10080	538	599	0.591381	7.26474e-12	2.1179e-11	9.30386	9.02407	UP	Yes*	zapC	cell division protein ZapC
PRL05_13015	376	420	0.586675	1.29167e-08	3.24883e-08	8.78711	8.51143	UP	Yes*	ftsL	cell division protein FtsL
PRL05_10020	502	706	0.25435	0.00267304	0.0043937	9.29382	9.14902	UP	Yes*	sulA	cell division inhibitor SulA
PRL05_12985	876	1274	0.205969	0.00120739	0.00206882	10.1112	9.98462	UP	Yes*	ftsW	cell division protein FtsW
PRL05_12960	926	1376	0.174935	0.00450147	0.00719646	10.2	10.0859	UP	Yes*	ftsA	cell division protein FtsA
PRL05_21220	3190	5716	-0.0951182	0.00276864	0.00453973	12.0624	12.0577	DOWN	Yes*	zipA	cell division protein ZipA
PRL05_06820	927	1853	-0.25289	1.09504e-05	2.2748e-05	10.327	10.3865	DOWN	Yes*	damX	cell division protein DamX
PRL05_00550	888	1863	-0.322665	2.81164e-08	6.93548e-08	10.2865	10.3743	DOWN	Yes*	ftsB	cell division protein FtsB
PRL05_03320	334	721	-0.36382	0.000111065	0.000211947	8.88958	8.99252	DOWN	Yes*	zapE	cell division protein ZapE
PRL05_17760	1476	3352	-0.436998	0	0	11.0553	11.1897	DOWN	Yes*	rodZ	cytoskeleton protein RodZ
PRL05_12955	1976	4698	-0.503132	0	0	11.4973	11.6586	DOWN	Yes*	ftsZ	cell division protein FtsZ
PRL05_11425	96	232	-0.526687	0.00207991	0.00347082	7.14882	7.30819	DOWN	Yes*	minE	cell division topological specificity factor MinE
PRL05_03840	784	1986	-0.594609	0	0	10.1943	10.3912	DOWN	Yes*	cpoB	cell division protein CpoB
PRL05_12100	749	2491	-0.987356	0	0	10.2617	10.6177	DOWN	Yes*	ldtA	L,D-transpeptidase
PRL05_03405	41	139	-1.01506	2.75628e-05	5.55809e-05	6.11189	6.43406	DOWN	Yes	mreD	rod shape-determining protein MreD
PRL05_03415	694	2539	-1.12492	0	0	10.2013	10.6119	DOWN	Yes	mreB	rod shape-determining protein MreB
PRL05_11420	201	938	-1.47606	0	0	8.55373	9.09248	DOWN	Yes	minD	septum site-determining protein MinD
PRL05_12925	110	526	-1.51123	0	0	7.70645	8.24773	DOWN	Yes	zapD	cell division protein ZapD
PRL05_13780	310	2286	-2.13615	0	0	9.45032	10.2444	DOWN	Yes	pbpG	D-alanyl-D-alanine endopeptidase
					* Significant (p<0.05), log 2FC <1 or -1
			Table S10. This sheet presents differential gene expression data for genes governing cell division. Each row represents a single gene, identified by its Gene_ID, along with the corresponding Gene_name and Product description. Expression values are shown for both the treated (T) and control (C) conditions, with additional columns for normalized counts (T_normalized and C_normalized) to account for…

## Sheet: Fatty acid degradation
Gene_IDs	T	C	log2FoldChange	pvalue	qvalue	T_normalized	C_normalized	Regulation	Significance	Gene_name	Product
PRL05_06570	16141	4052	2.74036	0	0	13.7787	12.6897	UP	Yes	fadE	acyl-CoA dehydrogenase FadE
PRL05_21760	2532	1201	1.82237	0	0	11.2642	10.5015	UP	Yes	fadJ	fatty acid oxidation complex subunit alpha FadJ
PRL05_01305	617	386	1.423	0	0	9.30521	8.70248	UP	Yes	not available	acetyl-CoA C-acetyltransferase
PRL05_21745	1558	1054	1.31015	0	0	10.6685	10.1023	UP	Yes	fadL	long-chain fatty acid transporter FadL
PRL05_23600	1085	858	1.08498	0	0	10.1966	9.71896	UP	Yes	fadA	acetyl-CoA C-acyltransferase FadA
PRL05_18955	211	169	1.06655	7.07212e-13	2.14077e-12	7.83006	7.37973	UP	Yes	not available	thiolase family protein
PRL05_11375	748	703	0.835845	0	0	9.71839	9.34026	UP	Yes*	fadR	fatty acid metabolism transcriptional regulator FadR
PRL05_21755	431	471	0.618292	1.71393e-10	4.76881e-10	8.97614	8.68704	UP	Yes*	fadI	acetyl-CoA C-acyltransferase FadI
PRL05_23605	1481	1755	0.501432	0	0	10.7888	10.5438	UP	Yes*	fadB	fatty acid oxidation complex subunit alpha FadB
PRL05_16185	942	1214	0.380362	1.63859e-09	4.3346e-09	10.168	9.97168	UP	Yes*	not available	acetyl-CoA C-acetyltransferase
PRL05_17105	174	386	-0.403182	0.00186488	0.0031295	7.96283	8.07911	DOWN	Yes*	pcaF	3-oxoadipyl-CoA thiolase
PRL05_01810	103	238	-0.461986	0.00563299	0.00889943	7.22801	7.36348	DOWN	Yes*	not available	FAD-dependent oxidoreductase
PRL05_15095	230	830	-1.10515	0	0	8.60564	9.00165	DOWN	Yes	not available	S-(hydroxymethyl)glutathione dehydrogenase/class III alcohol dehydrogenase
PRL05_17125	52	235	-1.42975	1.14386e-12	3.41822e-12	6.61155	7.09731	DOWN	Yes	not available	2,3-dehydroadipyl-CoA hydratase
PRL05_15455	5854	31378	-1.67593	0	0	13.4875	14.1165	DOWN	Yes	adhE	bifunctional acetaldehyde-CoA/alcohol dehydrogenase
PRL05_14580	1840	9969	-1.69141	0	0	11.825	12.4587	DOWN	Yes	adhP	alcohol dehydrogenase AdhP
	* Significant (p<0.05), log 2FC <1 or -1
Table S11. This sheet presents differential gene expression data for genes governing fatty acid degradation. Each row represents a single gene, identified by its Gene_ID, along with the corresponding Gene_name and Product description. Expression values are shown for both the treated (T) and control (C) conditions, with additional columns for normalized counts (T_normalized and C_normalized) to ac…

## Sheet: Peptidoglycan metabolism
Gene_IDs	T	C	log2FoldChange	pvalue	qvalue	T_normalized	C_normalized	Regulation	Significance	Gene_name	Product
PRL05_06615	3644	2756	1.14928	0	0	11.9312	11.4248	UP	Yes	mltD	murein transglycosylase D
PRL05_08255	192	175	0.880083	5.90103e-09	1.5162e-08	7.73848	7.35924	UP	Yes*	murQ	N-acetylmuramic acid 6-phosphate etherase
PRL05_03120	465	509	0.615896	3.87241e-11	1.09851e-10	9.08654	8.79788	UP	Yes*	dacB	serine-type D-Ala-D-Ala carboxypeptidase
PRL05_03120	465	509	0.615896	3.87241e-11	1.09851e-10	9.08654	8.79788	UP	Yes*	dacB	serine-type D-Ala-D-Ala carboxypeptidase
PRL05_03245	120	140	0.523939	0.00375596	0.00606419	7.14846	6.91276	UP	Yes*	mtgA	monofunctional biosynthetic peptidoglycan transglycosylase
PRL05_03245	120	140	0.523939	0.00375596	0.00606419	7.14846	6.91276	UP	Yes*	mtgA	monofunctional biosynthetic peptidoglycan transglycosylase
PRL05_12990	793	1013	0.39309	1.15459e-08	2.91223e-08	9.91593	9.71497	UP	Yes*	murD	UDP-N-acetylmuramoyl-L-alanine--D-glutamate ligase
PRL05_13000	1091	1473	0.313225	6.61902e-08	1.59391e-07	10.3983	10.2284	UP	Yes*	murF	UDP-N-acetylmuramoyl-tripeptide--D-alanyl-D-alanine ligase
PRL05_12970	732	1012	0.279038	7.40979e-05	0.000143804	9.83158	9.67608	UP	Yes*	not available	D-alanine--D-alanine ligase
PRL05_08260	274	379	0.278309	0.0155886	0.0232724	8.41242	8.26044	UP	Yes*	murP	PTS N-acetylmuramic acid transporter subunit IIBC
PRL05_13010	4561	6392	0.259414	0	0	12.4773	12.328	UP	Yes*	not available	peptidoglycan glycosyltransferase FtsI
PRL05_12980	584	830	0.239188	0.00226359	0.00375981	9.51653	9.3774	UP	Yes*	murG	undecaprenyldiphospho-muramoylpentapeptide beta-N-acetylglucosaminyltransferase
PRL05_06860	606	880	0.208146	0.00652928	0.0102521	9.57861	9.4518	UP	Yes*	mrcA	peptidoglycan glycosyltransferase/peptidoglycan DD-transpeptidase MrcA
PRL05_00520	11935	17399	0.202525	0	0	13.8809	13.7545	UP	Yes*	nlpD	murein hydrolase activator NlpD
PRL05_13005	1343	2478	-0.137386	0.00475454	0.00756948	10.8269	10.8394	DOWN	Yes*	murE	UDP-N-acetylmuramoyl-L-alanyl-D-glutamate--2,6-diaminopimelate ligase
PRL05_03155	340	732	-0.359978	0.000115223	0.000219181	8.91402	9.01547	DOWN	Yes*	murA	UDP-N-acetylglucosamine 1-carboxyvinyltransferase
PRL05_12995	492	1138	-0.463439	1.27126e-09	3.38122e-09	9.47973	9.62338	DOWN	Yes*	mraY	phospho-N-acetylmuramoyl-pentapeptide-transferase
PRL05_04265	519	1454	-0.73989	0	0	9.64906	9.90239	DOWN	Yes*	dacA	D-alanyl-D-alanine carboxypeptidase DacA
PRL05_10570	541	1665	-0.87549	0	0	9.75384	10.064	DOWN	Yes*	ybjG	undecaprenyl-diphosphate phosphatase
PRL05_11700	585	2022	-1.04294	0	0	9.92559	10.303	DOWN	Yes	mepM	murein DD-endopeptidase MepM
PRL05_00190	211	749	-1.08139	0	0	8.47317	8.85896	DOWN	Yes	mltB	lytic murein transglycosylase B
PRL05_14380	152	594	-1.22006	0	0	8.05466	8.49037	DOWN	Yes	mrdA	penicillin-binding protein 2
PRL05_26840	136	558	-1.29033	0	0	7.92235	8.3834	DOWN	Yes	murB	UDP-N-acetylmuramate dehydrogenase
PRL05_10580	400	1645	-1.29368	0	0	9.47101	9.94553	DOWN	Yes	dacC	serine-type D-Ala-D-Ala carboxypeptidase
PRL05_12185	147	609	-1.30429	0	0	8.03892	8.50672	DOWN	Yes	not available	MurR/RpiR family transcriptional regulator
PRL05_02270	336	1896	-1.75009	0	0	9.40073	10.051	DOWN	Yes	bacA	undecaprenyl-diphosphate phosphatase
		* Significant (p<0.05), log 2FC <1 or -1
Table S12. This sheet presents differential gene expression data for genes governing peptidoglycan metabolism. Each row represents a single gene, identified by its Gene_ID, along with the corresponding Gene_name and Product description. Expression values are shown for both the treated (T) and control (C) conditions, with additional columns for normalized counts (T_normalized and C_normalized) to …

## Sheet: Energy metabolism
Gene_IDs	T	C	log2FoldChange	pvalue	qvalue	T_normalized	C_normalized	Regulation	Significance	Gene_name	Product
PRL05_03915	856	765	0.908482	0	0	9.89565	9.48825	UP	Yes*	sdhB	succinate dehydrogenase iron-sulfur subunit SdhB
PRL05_21035	183	237	0.373288	0.00901962	0.0139102	7.802	7.61634	UP	Yes*	frdD	fumarate reductase subunit FrdD
PRL05_21035	183	237	0.373288	0.00901962	0.0139102	7.802	7.61634	UP	Yes*	frdD	fumarate reductase subunit FrdD
PRL05_21030	96	127	0.342609	0.0810972	0.10813	6.87598	6.70948	UP	NO	frdC	fumarate reductase subunit FrdC
PRL05_03930	567	774	0.297346	0.000210808	0.000390493	9.45771	9.29552	UP	Yes*	sdhC	succinate dehydrogenase cytochrome b556 subunit
PRL05_03920	1453	2164	0.171666	0.000476396	0.000853602	10.8511	10.7379	UP	Yes*	sdhA	succinate dehydrogenase flavoprotein subunit
PRL05_03340	7787	12257	0.0918649	1.16907e-05	2.4239e-05	13.2959	13.2146	UP	Yes*	mdh	malate dehydrogenase
PRL05_03935	4040	6507	0.0586941	0.0425765	0.0595716	12.3586	12.291	UP	Yes*	gltA	citrate synthase
PRL05_03910	2890	5158	-0.089411	0.00747679	0.0116344	11.9182	11.9112	DOWN	Yes*	sucA	2-oxoglutarate dehydrogenase E1 component
PRL05_12850	1569	3140	-0.254588	8.36006e-09	2.12765e-08	11.0866	11.147	DOWN	Yes*	lpdA	dihydrolipoyl dehydrogenase
PRL05_05200	287	676	-0.489641	8.67894e-07	1.94841e-06	8.71162	8.86414	DOWN	Yes*	not available	citrate synthase
PRL05_13495	6325	15236	-0.522015	0	0	13.1817	13.351	DOWN	Yes*	mqo	malate dehydrogenase (quinone)
PRL05_21020	689	1778	-0.621348	0	0	10.017	10.2243	DOWN	Yes*	frdA	fumarate reductase (quinol) flavoprotein subunit
PRL05_21025	226	589	-0.635614	6.61596e-09	1.69341e-08	8.41639	8.62511	DOWN	Yes*	frdB	fumarate reductase iron-sulfur protein
PRL05_06890	473	1380	-0.798425	0	0	9.53403	9.8128	DOWN	Yes*	pckA	phosphoenolpyruvate carboxykinase (ATP)
PRL05_12830	2365	6964	-0.811745	0	0	11.8584	12.1457	DOWN	Yes*	acnB	bifunctional aconitate hydratase 2/2-methylisocitrate dehydratase
PRL05_20035	2586	7988	-0.880781	0	0	12.0107	12.3259	DOWN	Yes*	acnA	aconitate hydratase AcnA
PRL05_11675	585	2599	-1.40512	0	0	10.0605	10.5806	DOWN	Yes	zwf	glucose-6-phosphate dehydrogenase
PRL05_17220	1321	6294	-1.50602	0	0	11.273	11.8349	DOWN	Yes	nifJ	pyruvate:ferredoxin (flavodoxin) oxidoreductase
PRL05_03900	397	2051	-1.62279	0	0	9.58911	10.1909	DOWN	Yes	sucC	ADP-forming succinate--CoA ligase subunit beta
	* Significant (p<0.05), log 2FC <1 or -1
Table S13. This sheet presents differential gene expression data for genes governing energy metabolism. Each row represents a single gene, identified by its Gene_ID, along with the corresponding Gene_name and Product description. Expression values are shown for both the treated (T) and control (C) conditions, with additional columns for normalized counts (T_normalized and C_normalized) to account…

## Sheet: hydrolase
Gene_IDs	T	C	log2FoldChange	pvalue	qvalue	T_normalized	C_normalized	Regulation	Significance	Gene_name	Product
PRL05_20595	93	78	1.00009	6.3075e-06	1.32829e-05	6.6528	6.25343	UP	Yes	not available	amidohydrolase/deacetylase family metallohydrolase
PRL05_16405	426	320	1.15911	0	0	8.82734	8.32951	UP	Yes	not available	MBL fold metallo-hydrolase
PRL05_13280	182	134	1.18804	3.23408e-13	9.92968e-13	7.58645	7.09601	UP	Yes	rihC	ribonucleoside hydrolase RihC
PRL05_19875	368	269	1.19843	0	0	8.6063	8.09588	UP	Yes	yciA	acyl-CoA thioester hydrolase YciA
PRL05_26515	38	27	1.23937	0.000572862	0.00101846	5.27555	4.86558	UP	Yes	not available	glycoside hydrolase family protein
PRL05_08365	52	34	1.35931	1.45328e-05	2.99581e-05	5.71047	5.23675	UP	Yes	not available	phosphonoacetaldehyde hydrolase
PRL05_05070	257	161	1.42104	0	0	8.03587	7.45076	UP	Yes	not available	sucrose-6-phosphate hydrolase
PRL05_06275	55	31	1.57349	6.05772e-07	1.37547e-06	5.7441	5.20341	UP	Yes	not available	HAD-IB family hydrolase
PRL05_14335	1681	507	2.47559	0	0	10.5555	9.56418	UP	Yes	not available	alpha/beta hydrolase
Table S14. This sheet presents differential gene expression data for genes involved in hydrolase activity. Each row represents a single gene, identified by its Gene_ID, along with the corresponding Gene_name and Product description. Expression values are shown for both the treated (T) and control (C) conditions, with additional columns for normalized counts (T_normalized and C_normalized) to acco…

## Sheet: oxidoreductase
Gene_IDs	T	C	log2FoldChange	pvalue	qvalue	T_normalized	C_normalized	Regulation	Significance	Gene_name	Product
PRL05_06985	14840	1100	4.50025	0	0	13.4496	11.8817	UP	Yes	glpD	glycerol-3-phosphate dehydrogenase
PRL05_18870	1676	301	3.22352	0	0	10.44	9.21269	UP	Yes	gap	type I glyceraldehyde-3-phosphate dehydrogenase
PRL05_13405	869	192	2.92458	0	0	9.53178	8.40603	UP	Yes	glpA	anaerobic glycerol-3-phosphate dehydrogenase subunit A
PRL05_06570	16141	4052	2.74036	0	0	13.7787	12.6897	UP	Yes	fadE	acyl-CoA dehydrogenase FadE
PRL05_15060	1030	274	2.65673	0	0	9.8181	8.7732	UP	Yes	not available	NAD(P)-dependent alcohol dehydrogenase
PRL05_27205	22	7	2.39841	2.41962e-05	4.9013e-05	4.20811	3.64797	UP	Yes	not available	succinate dehydrogenase flavoprotein subunit
PRL05_17080	1226	533	1.94808	0	0	10.1923	9.38855	UP	Yes	azoR	FMN-dependent NADH-azoreductase
PRL05_24005	352	159	1.89288	0	0	8.39563	7.63402	UP	Yes	pobA	4-hydroxybenzoate 3-monooxygenase
PRL05_13395	170	85	1.74633	0	0	7.36524	6.68306	UP	Yes	glpC	anaerobic glycerol-3-phosphate dehydrogenase subunit GlpC
PRL05_00230	452	236	1.68387	0	0	8.79983	8.10597	UP	Yes	norR	nitric oxide reductase transcriptional regulator NorR
PRL05_07740	1346	823	1.45605	0	0	10.426	9.80394	UP	Yes	mtlD	mannitol-1-phosphate 5-dehydrogenase
PRL05_24065	138	87	1.41191	3.45168e-13	1.05917e-12	7.13193	6.57409	UP	Yes	not available	NAD(P)H-dependent oxidoreductase
PRL05_22545	510	322	1.40977	0	0	9.03205	8.43786	UP	Yes	fdhF	formate dehydrogenase subunit alpha
PRL05_20720	7668	4894	1.39417	0	0	12.9509	12.3486	UP	Yes	msrA	peptide-methionine (S)-S-oxide reductase MsrA
PRL05_12205	40	26	1.36782	0.000132764	0.000250816	5.31981	4.87025	UP	Yes	not available	SDR family oxidoreductase
PRL05_12055	20	13	1.36782	0.00689137	0.0107828	4.28637	3.92439	UP	Yes	not available	thioester reductase domain-containing protein
PRL05_09790	311	206	1.3406	0	0	8.33025	7.77046	UP	Yes	not available	SDR family oxidoreductase
PRL05_04340	5914	3964	1.32351	0	0	12.5913	12.0166	UP	Yes	ahpC	alkyl hydroperoxide reductase subunit C
PRL05_13400	665	465	1.26245	0	0	9.44853	8.90632	UP	Yes	glpB	glycerol-3-phosphate dehydrogenase subunit GlpB
PRL05_15280	444	335	1.15273	0	0	8.88874	8.39276	UP	Yes	not available	alkene reductase
PRL05_20560	40	31	1.11406	0.00119508	0.00205165	5.38362	5.00318	UP	Yes	nrdG	anaerobic ribonucleoside-triphosphate reductase-activating protein
PRL05_06550	199	157	1.08834	1.35e-12	4.03e-12	7.73979	7.28293	UP	Yes	not available	Na(+)-translocating NADH-quinone reductase subunit A
PRL05_10895	31	25	1.05667	0.00633099	0.00995387	5.02141	4.67972	UP	Yes	narI	respiratory nitrate reductase subunit gamma
PRL05_13920	90	73	1.04836	3.81314e-06	8.16449e-06	6.59279	6.17857	UP	Yes	not available	SDR family oxidoreductase
PRL05_10295	49	40	1.03911	0.000712337	0.00125418	5.70267	5.32776	UP	Yes	not available	dimethyl sulfoxide reductase anchor subunit
PRL05_01480	97	81	1.00639	3.55e-06	7.61e-06	6.71276	6.30939	UP	Yes	arsC	glutaredoxin-dependent arsenate reductase
PRL05_09860	95	80	0.994259	5.58023e-06	1.17883e-05	6.68536	6.28704	UP	Yes	not available	PDR/VanB family oxidoreductase
PRL05_25895	251	234	0.84751	1.1887e-10	3.33507e-10	8.13535	7.76344	UP	Yes	not available	SDR family oxidoreductase
PRL05_02170	2194	2366	0.637445	0	0	11.322	11.0197	UP	Yes	not available	putative quinol monooxygenase
PRL05_14605	172	207	0.479109	0.00139709	0.00237492	7.68289	7.45816	UP	Yes	not available	putative FMN-dependent luciferase-like monooxygenase
Table S15. This sheet presents differential gene expression data for genes involved in oxidoreductase activity. Each row represents a single gene, identified by its Gene_ID, along with the corresponding Gene_name and Product description. Expression values are shown for both the treated (T) and control (C) conditions, with additional columns for normalized counts (T_normalized and C_normalized) to…

## Sheet: mar genes
Gene_IDs	T	C	log2FoldChange	pvalue	qvalue	T_normalized	C_normalized	Regulation	Significance	Gene_name	Product
PRL05_19360	910	607	1.3305	0	0	9.88707	9.31628	UP	Yes	marA	MDR efflux pump AcrAB transcriptional activator MarA
PRL05_19365	1297	217	3.32574	0	0	10.0562	8.80307	UP	Yes	marB	multiple antibiotic resistance protein MarB
Table S16. This sheet presents differential gene expression data for mar genes. Each row represents a single gene, identified by its Gene_ID, along with the corresponding Gene_name and Product description. Expression values are shown for both the treated (T) and control (C) conditions, with additional columns for normalized counts (T_normalized and C_normalized) to account for differences in sequ…

## Sheet: ATPase
Gene_IDs	T	C	log2FoldChange	pvalue	qvalue	T_normalized	C_normalized	Regulation	Significance	Gene_name	Product
PRL05_12090	336	259	1.12184	0	0	8.49211	8.0119	UP	Yes	not available	AAA family ATPase
PRL05_07195	1900	1446	1.14026	0	0	10.9931	10.4917	UP	Yes	zntA	Zn(II)/Cd(II)/Pb(II) translocating P-type ATPase ZntA
PRL05_20510	795	540	1.30433	0	0	9.69748	9.13774	UP	Yes	mgtA	magnesium-translocating P-type ATPase
PRL05_26365	1486	914	1.4475	0	0	10.5708	9.9514	UP	Yes	not available	ParA family plasmid-partitioning AAA ATPase
PRL05_04815	556	300	1.63645	0	0	9.10955	8.42911	UP	Yes	not available	cation-transporting P-type ATPase
PRL05_26100	1738	604	2.27114	0	0	10.6381	9.71711	UP	Yes	not available	AAA family ATPase
Table S17. This sheet presents differential gene expression data for genes involved in ATPase activity. Each row represents a single gene, identified by its Gene_ID, along with the corresponding Gene_name and Product description. Expression values are shown for both the treated (T) and control (C) conditions, with additional columns for normalized counts (T_normalized and C_normalized) to account…

## Sheet: nitrogen metabolism
Gene_IDs	T	C	log2FoldChange	pvalue	qvalue	T_normalized	C_normalized	Regulation	Significance	Gene_name	Product
PRL05_10895	31	25	1.05667	0.00633099	0.00995387	5.02141	4.67972	UP	Yes	narI	respiratory nitrate reductase subunit gamma
PRL05_10905	86	78	0.887194	8.78655e-05	0.000169239	6.56722	6.20975	UP	Yes	narH	nitrate reductase subunit beta
PRL05_10900	39	39	0.746331	0.0230947	0.0336003	5.44644	5.17425	UP	Yes	narJ	nitrate reductase molybdenum cofactor assembly chaperone
PRL05_00235	76	90	0.502406	0.0264842	0.0381696	6.49064	6.27245	UP	Yes	norV	anaerobic nitric oxide reductase flavorubredoxin
PRL05_10920	82	102	0.431458	0.0453011	0.0631535	6.62148	6.42614	UP	Yes	not available	NarK family nitrate/nitrite MFS transporter
PRL05_10910	178	224	0.41471	0.00447686	0.00715924	7.75035	7.54933	UP	Yes	not available	nitrate reductase subunit alpha
PRL05_20905	679	896	0.346244	2.79107e-06	6.04356e-06	9.70457	9.52253	UP	Yes	nsrR	nitric oxide-sensing transcriptional repressor NsrR
PRL05_16830	5914	8449	0.231685	0	0	12.8598	12.7217	UP	Yes	fnr	fumarate/nitrate reduction transcriptional regulator Fnr
PRL05_10965	783	1456	-0.148595	0.0195055	0.0287681	10.0519	10.0689	DOWN	Yes	nasR	nitrate regulatory protein NasR
PRL05_10925	166	368	-0.402191	0.00244034	0.00403591	7.89475	8.01041	DOWN	Yes	narX	nitrate/nitrite two-component system sensor histidine kinase NarX
PRL05_10940	3694	9098	-0.554034	0	0	12.4163	12.5984	DOWN	Yes	not available	nitrate reductase
PRL05_10525	93	255	-0.708863	2.68657e-05	5.42364e-05	7.16681	7.39454	DOWN	Yes	nfsA	nitroreductase NfsA
PRL05_21735	407	1474	-1.1103	0	0	9.42779	9.8302	DOWN	Yes	not available	formate/nitrite transporter family protein
PRL05_22810	921	3563	-1.20549	0	0	10.6385	11.0819	DOWN	Yes	glnL	nitrogen regulation protein NR(II)
PRL05_03230	321	1258	-1.22416	0	0	9.12856	9.57426	DOWN	Yes	ptsN	PTS IIA-like nitrogen regulatory protein PtsN
PRL05_10945	4550	19500	-1.3532	0	0	12.9969	13.5008	DOWN	Yes	nirB	nitrite reductase large subunit NirB
PRL05_14710	98	426	-1.37367	0	0	7.4872	7.97327	DOWN	Yes	not available	NarK family nitrate/nitrite MFS transporter
PRL05_22805	576	2607	-1.43192	0	0	10.0486	10.5791	DOWN	Yes	glnG	nitrogen regulation protein NR(I)
PRL05_14730	104	516	-1.56446	0	0	7.64814	8.20822	DOWN	Yes	narI	respiratory nitrate reductase subunit gamma
PRL05_18705	43	283	-1.97206	0	0	6.5753	7.25225	DOWN	Yes	not available	nitronate monooxygenase
PRL05_12110	4213	32970	-2.2219	0	0	13.2452	14.08	DOWN	Yes	nac	nitrogen assimilation transcriptional regulator NAC
PRL05_14715	219	1722	-2.22875	0	0	8.99414	9.81788	DOWN	Yes	not available	nitrate reductase subunit alpha
PRL05_14725	28	265	-2.49616	0	0	6.22817	7.06085	DOWN	Yes	narW	nitrate reductase molybdenum cofactor assembly chaperone
PRL05_14720	96	915	-2.50633	0	0	7.94951	8.85463	DOWN	Yes	narH	nitrate reductase subunit beta
PRL05_10955	654	8515	-2.95631	0	0	10.9163	12.0027	DOWN	Yes	ntrB	nitrate ABC transporter permease
Table S18. This sheet presents differential gene expression data for genes involved in nitrogen metabolism. Each row represents a single gene, identified by its Gene_ID, along with the corresponding Gene_name and Product description. Expression values are shown for both the treated (T) and control (C) conditions, with additional columns for normalized counts (T_normalized and C_normalized) to acc…
