# Supplementary material for: Ciprofloxacin consumption and phenomenal transformation to a culturable nanometer-sized- bacterium by a Klebsiella strain SG01
Source: Research Square preprint supplement (doi:10.21203/rs.3.rs-5801647/v1), 2025-08-12
Supplement: Supplementary file 3 [file d9dcc78340913bc9200886a0.xlsx]

## Sheet: Lag Phase basepeak chromatogram
Table S7. Raw metabolomics data exported from LC-MS analysis of lag-phase harvested MSM-CIP grown SGO1 cells. Each row corresponds to a mass spectrometry scan.
Retention time	Base peak intensity	z-axis
29.9964	15075.7	772.612
29.9798	14177.6	772.612
29.9632	13293.3	728.586
29.9465	13003.3	772.612
29.9299	12809.1	772.612
29.9133	12444.3	772.612
29.8967	11799.4	772.613
29.88	10901.5	772.612
29.8634	10685.4	772.612
29.8468	10316.4	772.611
29.8301	10996	772.612
29.8135	9753.62	772.612
29.7969	9542.52	614.481
29.7803	9550.67	702.533
29.7636	8828.87	728.586
29.747	9242	658.508
29.7304	9957.22	658.508
29.7138	9155.29	614.482
29.6971	9410.09	702.534
29.6805	9488.78	702.534
29.6639	9526.35	702.535
29.6472	8879.55	614.483
29.6306	9223.1	702.534
29.614	8541.77	658.508
29.5973	8855.44	658.508
29.5807	9836.65	702.534
29.5641	8882.36	702.534
29.5475	8709.43	658.508
29.5308	8008.54	702.534
29.5142	7833.62	658.508
29.4976	8223.56	658.508
29.4809	7821.7	658.507
29.4643	7157.34	702.534
29.4477	7340.43	658.508
29.4311	7250.15	658.508
29.4144	6764.97	746.561
29.3978	6914.41	658.509
29.3812	6306.94	702.534
29.3645	6441.87	658.508
29.3479	6574.78	658.509
29.3313	6305	658.508
29.3147	6354.1	702.534
29.298	6191.14	658.507
29.2814	5763.93	728.586
29.2648	6397.54	658.508
29.2482	6312.14	658.508
29.2315	5882.3	658.509
29.2149	5616.72	658.509
29.1983	5667.19	658.508
29.1817	5490.85	702.535
29.165	5728.87	658.508
29.1484	5218.28	658.508
29.1318	5347.45	684.56
29.1151	5158.12	684.56
29.0985	5303.65	702.535
29.0819	5200.09	746.561
29.0653	5044.47	746.561
29.0486	5052.34	728.585
29.032	5110.03	449.196
29.0154	4930.91	728.585
28.9987	4958.72	728.585
28.9821	4710.05	449.196
28.9655	4920.54	449.196
28.9489	4963.44	449.196
28.9322	5349.76	507.201
28.9156	5378.67	507.201
28.899	5731.04	449.195
28.8824	5259.06	449.196
28.8657	5494.08	507.202
28.8491	5841.06	449.196
28.8325	5686.66	507.201
28.8158	5489.91	449.197
28.7992	5424.24	449.195
28.7826	6158.5	449.196
28.7659	6219.51	507.201
28.7493	6039.6	449.196
28.7327	6365.88	449.196
28.7161	6352.81	507.201
28.6994	6547.83	507.201
28.6828	6743.91	507.201
28.6662	7249.79	449.196
28.6495	7468.55	449.196
28.6329	7153.22	507.201
28.6163	7526.7	449.196
28.5997	7290.95	449.196
28.583	7426.56	449.196
28.5664	7372.49	449.197
28.5498	7669.12	449.196
28.5331	8357.32	449.196
28.5165	8025.05	449.196
28.4999	8623.38	449.196
28.4833	8310.93	449.196
28.4666	8111.07	507.2
28.45	7901.7	507.201
28.4334	8643.21	449.196
28.4167	8727.42	507.202
28.4001	8234.38	449.196
28.3835	7986.9	507.201
28.3669	8392.31	449.196
28.3503	8762.94	449.196
28.3336	8962.02	449.196
28.317	8565.73	449.196
28.3004	9099.69	449.196
28.2837	9511.72	449.197
28.2671	8722.74	449.196
28.2504	9336.51	449.196
28.2338	9262.85	449.196
28.2172	9164.43	449.196
28.2006	9508.31	449.197
28.1839	8833.29	449.196
28.1673	9324.58	449.196
28.1507	9414.75	507.201
28.134	9953.98	449.196
28.1174	9757.08	449.197
28.1008	10202.8	449.196
28.0842	9756.94	449.195
28.0675	9699.48	449.196
28.0509	9989	449.196
28.0343	11111.1	546.399
28.0176	11296	590.425
28.001	10751.1	590.424
27.9844	11593.1	590.425
27.9678	12713	590.425
27.9511	11838	590.425
27.9345	12388.2	590.424
27.9179	12353.9	590.425
27.9013	12604	590.425
27.8846	11851.1	590.425
27.868	11738.5	634.45
27.8514	12168	634.451
27.8347	11803.9	634.45
27.8181	11469.1	634.451
27.8015	10041.7	634.45
27.7848	10048.5	634.451
27.7682	9881.98	449.196
27.7516	9958.62	449.196
27.735	10520.9	449.196
27.7183	10319.8	507.202
27.7017	10716.1	449.196
27.6851	9919.32	449.196
27.6684	10595.9	507.201
27.6518	9800.75	507.201
27.6352	10737.4	449.196
27.6186	10532.2	507.201
27.6019	10828.2	449.196
27.5853	10778.8	507.2
27.5687	11022.9	507.201
27.552	10907.4	507.201
27.5354	11618.8	507.201
27.5188	11375.3	507.201
27.5022	11372	449.196
27.4855	11668.4	449.196
27.4689	11269.5	449.196
27.4523	11617.1	507.202
27.4356	11715.4	507.201
27.419	12015.7	449.197
27.4024	11966.7	449.196
27.3858	12170	507.201
27.3692	12232.3	507.202
27.3525	11924.4	449.196
27.3359	11807.3	507.201
27.3193	11770.2	507.201
27.3026	12296	449.196
27.286	13464.3	507.202
27.2694	12406.8	449.196
27.2528	13084.8	449.196
27.2361	12211.9	449.197
27.2195	12030.9	449.196
27.2029	12752.3	507.201
27.1862	11954.9	449.196
27.1696	13013.6	507.201
27.153	13430	507.201
27.1364	12522.5	507.201
27.1197	13403.9	449.197
27.1031	12516.4	507.201
27.0865	12628.3	449.196
27.0698	12288.8	449.196
27.0532	12729.9	449.196
27.0366	12395.3	449.197
27.02	12466.3	449.196
27.0033	12354.8	449.196
26.9867	12706	507.201
26.9701	13672.5	449.196
26.9534	12674.4	507.202
26.9368	15249.9	149.024
26.9202	16250.8	149.024
26.9036	19149.9	149.024
26.8869	20320.5	149.024
26.8703	22011.4	149.024
26.8537	22372.6	149.024
26.837	22654	149.024
26.8204	25013.8	149.024
26.8038	25771.2	149.024
26.7872	25827.5	149.023
26.7705	25924	149.023
26.7539	26296.7	149.024
26.7373	25774.8	149.024
26.7206	25429.9	149.024
26.704	25610.3	149.024
26.6874	25510.3	149.024
26.6708	23370.2	149.024
26.6541	21757.4	149.024
26.6375	20647.3	149.024
26.6209	18273.6	149.023
26.6042	16056.7	149.024
26.5876	15740.8	149.024
26.571	12954.2	149.024
26.5544	12978.7	449.196
26.5378	12440.4	449.196
26.5211	12869.7	449.197
26.5045	14948.5	532.383
26.4879	15907.7	532.384
26.4712	18149.2	532.384
26.4546	20465.4	532.384
26.438	23165.2	532.384
26.4214	27240.6	532.384
26.4047	29995.3	532.384
26.3881	34129.3	532.384
26.3715	39066.5	532.384
26.3548	41209.5	532.384
26.3382	47923	532.384
26.3216	50111.6	576.41
26.305	56836.9	576.41
26.2883	63503.5	576.411
26.2717	67783.5	576.411
26.2551	74000.5	576.41
26.2384	75474.9	576.41
26.2218	77422.4	620.437
26.2052	83437.3	620.437
26.1886	88245.1	620.437
26.1719	90149.7	620.437
26.1553	91272.2	620.436
26.1387	93290.6	620.436
26.122	89068.3	664.463
26.1054	88518	664.463
26.0888	86376.1	664.462
26.0722	84276.4	664.463
26.0555	81456.8	664.463
26.0389	75506.6	664.463
26.0223	70664.3	708.489
26.0056	81095.8	284.331
25.989	92792	284.332
25.9724	105987	284.332
25.9558	118689	284.332
25.9391	135444	284.332
25.9225	149678	284.332
25.9059	170461	284.332
25.8892	187961	284.332
25.8726	202668	284.332
25.856	219704	284.332
25.8394	239909	284.332
25.8227	254409	284.332
25.8061	269937	284.332
25.7895	289922	284.332
25.7729	297015	284.332
25.7562	303653	284.332
25.7396	312436	284.332
25.723	317666	284.332
25.7064	329384	284.332
25.6897	333110	284.332
25.6731	333892	284.332
25.6565	339590	284.332
25.6398	352091	284.332
25.6232	351875	284.332
25.6066	354210	284.332
25.59	349625	284.332
25.5733	359634	284.332
25.5567	356715	284.332
25.5401	357739	284.332
25.5234	359841	284.332
25.5068	353150	284.332
25.4902	356282	284.332
25.4736	349638	284.332
25.4569	339712	284.332
25.4403	340728	284.332
25.4237	328580	284.332
25.407	318261	284.332
25.3904	302437	284.332
25.3738	291360	284.332
25.3571	270914	284.332
25.3405	254241	284.332
25.3239	224881	284.332
25.3073	194904	284.332
25.2906	164661	284.332
25.274	133168	284.332
25.2574	100558	284.332
25.2407	71593.8	284.331
25.2241	46867.1	284.331
25.2075	27669.5	284.331
25.1909	17494.2	449.197
25.1742	16856.7	449.196
25.1576	18095	449.196
25.141	17971.6	449.196
25.1244	17434.3	449.196
25.1077	17351.3	449.196
25.0911	18702.5	449.197
25.0745	18595.4	449.196
25.0578	18741.2	449.196
25.0412	19432.7	449.196
25.0246	19299.8	449.196
25.008	16749.7	449.196
24.9913	18374.7	449.197
24.9747	18557.6	449.196
24.9581	18153.1	449.196
24.9415	19460	449.196
24.9248	18505	449.196
24.9082	18549.6	449.197
24.8916	19176.8	449.196
24.8749	18523.8	449.197
24.8583	19178.1	449.196
24.8417	19324.2	449.196
24.8251	19109.4	449.197
24.8084	19696.7	449.196
24.7918	19669.7	449.196
24.7752	19543.6	449.197
24.7586	20134.6	449.196
24.7419	19064.5	449.196
24.7253	18816.8	449.196
24.7087	19241	449.197
24.692	18461.6	449.197
24.6754	19218.4	449.197
24.6588	20069.8	449.197
24.6422	20291.6	449.197
24.6255	19853.6	449.197
24.6089	19421.3	449.197
24.5923	19090.9	449.196
24.5756	19187.7	449.196
24.559	20394.5	449.196
24.5424	19754.5	449.196
24.5257	19478.1	449.197
24.5091	20194.7	449.196
24.4925	20375.7	449.197
24.4759	19430.7	449.196
24.4592	20116.5	449.197
24.4426	19377.4	449.196
24.426	20210	449.196
24.4093	19862.6	449.197
24.3927	20333.2	449.197
24.3761	19734.3	449.197
24.3595	21201.2	449.197
24.3428	20701	449.197
24.3262	19688.9	449.196
24.3096	20520.2	449.197
24.293	21396.3	330.336
24.2763	27207.6	330.337
24.2597	27420.7	330.336
24.2431	32233.9	330.336
24.2264	35002.3	330.337
24.2098	39347.8	330.337
24.1932	43246.3	330.337
24.1766	48164.9	330.337
24.1599	50879.6	330.337
24.1433	51109.2	330.337
24.1267	57923.5	330.337
24.1101	57603.3	330.337
24.0934	60135	330.337
24.0768	61333.5	330.337
24.0602	64733.2	330.337
24.0435	68468.4	330.337
24.0269	68088.2	330.337
24.0103	70300.6	330.337
23.9937	68718.8	330.337
23.977	70993.4	330.337
23.9604	72354.9	330.337
23.9438	73248.2	330.337
23.9272	74807.9	330.337
23.9105	75627.6	330.337
23.8939	78850.8	330.337
23.8773	74628.2	330.337
23.8606	75933.8	330.337
23.844	73828.8	330.337
23.8274	74314.5	330.337
23.8107	74039.6	330.337
23.7941	69707.7	330.337
23.7775	63181.2	330.337
23.7609	61274.7	330.337
23.7442	54244.5	330.337
23.7276	52987.6	330.337
23.711	45844.4	330.337
23.6943	38324.1	330.336
23.6777	29773.1	330.336
23.6611	21154.4	330.336
23.6445	23450.2	256.3
23.6278	26061.8	256.3
23.6112	29038.8	256.3
23.5946	32643.8	256.3
23.5779	37433	256.3
23.5613	42163.3	256.3
23.5447	47245.8	256.3
23.5281	56250.5	256.3
23.5114	65957.9	256.3
23.4948	74328.2	256.3
23.4782	87560.4	256.3
23.4615	104958	256.3
23.4449	121818	256.3
23.4283	149026	256.3
23.4117	167913	256.3
23.3951	197892	256.301
23.3784	239509	256.301
23.3618	271509	256.301
23.3452	312122	256.301
23.3285	370454	256.301
23.3119	410732	256.301
23.2953	459888	256.301
23.2787	296252	256.305
23.262	329692	256.305
23.2454	365482	256.305
23.2288	406396	256.304
23.2121	438352	256.304
23.1955	470072	256.304
23.1789	443563	256.299
23.1623	477918	256.299
23.1456	515004	256.299
23.129	543648	256.301
23.1124	569493	256.301
23.0957	591668	256.301
23.0791	609000	256.301
23.0625	638566	256.301
23.0459	646862	256.301
23.0292	650689	256.301
23.0126	668272	256.301
22.996	670454	256.301
22.9793	669440	256.301
22.9627	674162	256.301
22.9461	683044	256.301
22.9295	680877	256.301
22.9128	678416	256.301
22.8962	657161	256.301
22.8796	656816	256.301
22.8629	618362	256.301
22.8463	591114	256.301
22.8297	565019	256.301
22.8131	525738	256.299
22.7964	473901	256.299
22.7798	472029	256.304
22.7632	415607	256.304
22.7465	356823	256.305
22.7299	492824	256.301
22.7133	367347	256.301
22.6967	252222	256.301
22.68	156286	256.301
22.6634	82695.4	256.3
22.6468	89451.1	415.212
22.6301	105288	415.212
22.6135	117908	415.212
22.5969	140383	415.212
22.5803	151642	415.212
22.5637	164163	415.212
22.547	187520	415.212
22.5304	202165	415.212
22.5138	216483	415.213
22.4971	229491	415.213
22.4805	236738	415.213
22.4639	239929	415.213
22.4473	244233	415.213
22.4306	245627	415.213
22.414	240059	415.213
22.3974	230092	415.213
22.3807	218636	415.213
22.3641	198431	415.213
22.3475	175021	415.213
22.3309	152868	415.212
22.3142	126348	415.212
22.2976	95018.8	415.212
22.281	74886.4	415.212
22.2643	50102.7	415.212
22.2477	33672.6	415.212
22.2311	20649.5	415.212
22.2145	20996	393.285
22.1978	22661.5	393.286
22.1812	24879.6	393.286
22.1646	31884.6	393.286
22.1479	36101	393.286
22.1313	42551.4	393.286
22.1147	51557.3	393.286
22.0981	61984.5	393.287
22.0814	74822.7	393.287
22.0648	89367	393.287
22.0482	108643	393.287
22.0315	127813	393.287
22.0149	157125	393.287
21.9983	184800	393.287
21.9817	215499	393.287
21.965	256369	393.287
21.9484	297134	393.287
21.9318	338466	393.287
21.9151	388661	393.287
21.8985	438496	393.287
21.8819	493619	393.288
21.8653	322627	393.298
21.8486	346212	393.298
21.832	385271	393.298
21.8154	408116	393.297
21.7987	428544	393.289
21.7821	450097	393.289
21.7655	465674	393.289
21.7489	462532	393.289
21.7323	467737	393.289
21.7156	454016	393.289
21.699	437102	393.289
21.6824	408711	393.297
21.6657	380956	393.298
21.6491	343451	393.298
21.6325	494524	393.288
21.6159	411656	393.288
21.5992	326389	393.287
21.5826	246399	393.287
21.566	209039	302.306
21.5493	220511	302.306
21.5327	236570	302.307
21.5161	242539	302.306
21.4995	245498	302.307
21.4828	253140	302.306
21.4662	259000	302.306
21.4496	253916	302.306
21.4329	254031	302.306
21.4163	248749	302.306
21.3997	237953	302.307
21.3831	225669	302.307
21.3664	214639	302.306
21.3498	191072	302.306
21.3332	163979	302.306
21.3165	134185	302.306
21.2999	99344.5	302.306
21.2833	69470.3	302.306
21.2667	44157.4	302.306
21.25	21645.3	302.305
21.2334	16737.9	449.197
21.2168	16653.3	449.197
21.2001	17913	449.197
21.1835	16405.9	449.196
21.1669	16190.6	449.197
21.1502	16285.8	449.197
21.1336	16031.7	449.197
21.117	16570	449.197
21.1004	16192.5	449.196
21.0837	16467	449.197
21.0671	16166.7	449.197
21.0505	15067.1	449.197
21.0338	16045.2	449.197
21.0172	15775.5	449.198
21.0006	15578	449.197
20.984	15751.6	449.196
20.9674	16315.5	449.197
20.9507	15763.2	449.197
20.9341	15982.3	449.197
20.9175	18032.1	390.146
20.9008	18301.8	390.146
20.8842	18522.3	390.146
20.8676	18537.1	390.146
20.851	18889.7	390.146
20.8343	21404.8	390.146
20.8177	21378.9	390.147
20.8011	21957.9	390.147
20.7844	23021.3	390.146
20.7678	22157.7	390.146
20.7512	24552.6	390.147
20.7346	24397.6	390.146
20.7179	26454.5	390.146
20.7013	26597.8	390.146
20.6847	28299.1	390.146
20.668	28574.9	390.146
20.6514	29490.2	390.147
20.6348	32905.5	390.147
20.6182	31567.1	390.147
20.6015	31458.7	390.146
20.5849	34823.6	390.147
20.5683	36397.3	390.147
20.5516	38059.6	390.146
20.535	38182	390.147
20.5184	40889.4	390.147
20.5018	42347.3	390.146
20.4851	46925.7	390.147
20.4685	44187.9	390.146
20.4519	51766.6	390.147
20.4352	52677.3	390.147
20.4186	54689.5	390.147
20.402	57800.6	390.147
20.3854	58235.6	390.147
20.3687	63843.5	390.147
20.3521	69292.9	390.147
20.3355	70335.5	390.147
20.3188	76076.4	390.147
20.3022	77584.7	390.147
20.2856	84859.7	390.147
20.269	89087.9	390.147
20.2523	95108.1	390.147
20.2357	101155	390.147
20.2191	105903	390.147
20.2024	114351	390.147
20.1858	123364	390.147
20.1692	128428	390.147
20.1526	137883	390.147
20.1359	146238	390.147
20.1193	157986	390.147
20.1027	167370	390.147
20.0861	183642	390.147
20.0694	193985	390.147
20.0528	207956	390.147
20.0362	223232	390.147
20.0196	238307	390.147
20.0029	256812	390.148
19.9863	277346	390.148
19.9697	300545	390.147
19.953	318593	390.147
19.9364	336578	390.148
19.9198	358036	390.148
19.9032	381560	390.148
19.8865	410180	390.148
19.8699	431751	390.148
19.8533	458126	390.148
19.8366	480294	390.148
19.82	443364	390.15
19.8034	463634	390.15
19.7868	368390	390.14
19.7701	386281	390.14
19.7535	403375	390.14
19.7369	419557	390.14
19.7202	430190	390.141
19.7036	437928	390.141
19.687	445588	390.141
19.6703	450382	390.141
19.6537	452624	390.141
19.6371	442451	390.141
19.6205	436591	390.141
19.6038	411120	390.141
19.5872	386503	390.14
19.5706	477779	390.15
19.554	433507	390.15
19.5373	438553	390.148
19.5207	365630	390.148
19.5041	299995	390.148
19.4874	264617	274.275
19.4708	317739	274.275
19.4542	377715	274.275
19.4376	450667	274.275
19.4209	466208	274.271
19.4043	356380	274.28
19.3877	402397	274.28
19.371	441673	274.279
19.3544	475584	274.279
19.3378	432692	274.273
19.3212	465332	274.274
19.3045	495369	274.276
19.2879	529633	274.276
19.2713	565111	274.276
19.2547	575744	274.276
19.238	594459	274.276
19.2214	591742	274.276
19.2048	596842	274.276
19.1882	597161	274.276
19.1715	581955	274.276
19.1549	565760	274.276
19.1383	519864	274.276
19.1216	477950	274.274
19.105	409396	274.273
19.0884	433001	274.28
19.0718	353938	274.28
19.0551	431249	274.276
19.0385	283759	274.275
19.0219	156053	274.275
19.0052	69390.7	274.275
18.9886	26859.4	274.274
18.972	14668.5	130.159
18.9554	15763.4	130.159
18.9387	14716.4	130.159
18.9221	16015.2	130.159
18.9055	14555.8	130.159
18.8888	14894	130.159
18.8722	14562.7	130.159
18.8556	14889	130.159
18.8389	14553.2	130.159
18.8223	15157.5	130.16
18.8057	15258.9	130.159
18.7891	14852.4	130.159
18.7724	14888.1	130.16
18.7558	15773.8	130.159
18.7392	13826.3	130.159
18.7226	15623.1	130.159
18.7059	15438.8	130.159
18.6893	14041	130.159
18.6727	16884.8	130.159
18.656	14391.6	130.159
18.6394	15754.8	130.159
18.6228	14172.4	130.159
18.6062	16646.9	130.159
18.5895	15807.3	130.159
18.5729	15542.5	130.159
18.5563	16591.1	130.159
18.5396	17302.9	130.16
18.523	15526.4	130.159
18.5064	16146.5	130.159
18.4898	16311.8	130.16
18.4731	16361.5	130.159
18.4565	16541.5	130.159
18.4399	15914.4	130.159
18.4233	15880.4	130.16
18.4066	15280.9	130.159
18.39	16448.6	130.159
18.3734	16091.6	130.159
18.3568	16181.6	130.16
18.3401	16216	130.159
18.3235	16950.5	130.159
18.3069	17037.5	130.159
18.2902	16613	130.16
18.2736	15875.3	130.159
18.257	16121.2	130.159
18.2404	15363.9	130.159
18.2237	15339.2	130.159
18.2071	15762.6	130.16
18.1905	17013.3	130.159
18.1738	16226.7	130.159
18.1572	14542.2	130.159
18.1406	15361.3	130.159
18.1239	16225.9	130.159
18.1073	15425	130.159
18.0907	16774.1	130.159
18.0741	17457.3	130.16
18.0574	17286.4	130.159
18.0408	16457	130.159
18.0242	16678.6	130.16
18.0075	17542.5	130.159
17.9909	17133.8	130.16
17.9743	15049.1	130.16
17.9577	15662.2	130.159
17.941	15708.2	130.159
17.9244	16439.6	130.159
17.9078	15994.3	130.159
17.8911	16218.2	130.159
17.8745	15030.4	130.159
17.8579	16017.3	130.159
17.8413	16987.3	130.159
17.8246	16198.9	130.159
17.808	16818.9	130.159
17.7914	16004.5	130.159
17.7748	16364.4	130.159
17.7581	17108.6	130.16
17.7415	15100.9	130.159
17.7249	16515.1	130.159
17.7083	15683.4	130.159
17.6916	17102.9	130.159
17.675	15576.7	130.159
17.6584	16743.8	130.159
17.6417	16058.8	130.159
17.6251	16450.7	130.159
17.6085	16330.3	130.159
17.5919	16842.3	130.159
17.5752	16856.3	130.16
17.5586	16595.5	130.159
17.542	15625.8	130.16
17.5253	14630.6	130.159
17.5087	15310.5	130.159
17.4921	17305.3	130.159
17.4755	16539.6	130.159
17.4588	16610.3	130.159
17.4422	16389.7	130.159
17.4256	16220.7	130.159
17.409	15569.5	130.16
17.3923	15843.6	130.16
17.3757	16035.9	130.159
17.3591	15580.3	130.16
17.3424	18318.2	130.159
17.3258	16355.2	130.159
17.3092	15253.4	130.16
17.2925	16072.6	130.16
17.2759	16817.8	130.159
17.2593	16863.1	130.159
17.2427	16009.1	130.159
17.226	15860.7	130.159
17.2094	16323.3	130.159
17.1928	16195	130.159
17.1761	17549.1	130.16
17.1595	18359.7	246.243
17.1429	24405.6	246.243
17.1263	29897	246.243
17.1096	38638.1	246.243
17.093	48045.1	246.244
17.0764	59188.8	246.244
17.0597	72299.6	246.244
17.0431	86838.1	246.244
17.0265	108689	246.244
17.0099	122881	246.244
16.9932	139730	246.244
16.9766	160834	246.244
16.96	173159	246.244
16.9434	187327	246.244
16.9267	199810	246.244
16.9101	206511	246.244
16.8935	209621	246.244
16.8769	210245	246.244
16.8602	203958	246.244
16.8436	192745	246.244
16.827	181602	246.244
16.8103	159282	246.244
16.7937	139805	246.244
16.7771	112917	246.244
16.7605	82454.7	246.244
16.7438	53116.7	246.244
16.7272	30707.6	246.243
16.7106	16558	130.16
16.6939	16411.8	130.159
16.6773	15815.8	332.141
16.6607	15969.3	130.159
16.6441	16472.2	130.16
16.6274	16201.2	130.16
16.6108	17048.4	332.141
16.5942	17035.8	130.159
16.5776	16554.3	130.16
16.5609	17031.6	332.141
16.5443	17087.8	130.16
16.5277	18770.1	130.16
16.511	18218.3	332.141
16.4944	16516.6	332.141
16.4778	17401.9	130.16
16.4611	16747.1	332.141
16.4445	16991.4	332.141
16.4279	18265.2	332.141
16.4113	17769.2	130.16
16.3946	18411.1	332.141
16.378	18809.5	332.141
16.3614	17594.4	332.141
16.3447	17782.8	332.141
16.3281	17909.5	332.141
16.3115	18806.6	332.141
16.2948	19152.7	332.142
16.2782	19242.1	332.141
16.2616	17476.7	332.141
16.2449	18085.9	332.141
16.2283	18439.2	332.141
16.2117	18353.5	332.141
16.1951	19165.5	332.141
16.1784	19399.1	332.141
16.1618	19997.9	332.141
16.1452	19353.6	332.141
16.1285	19790	332.141
16.1119	19475	332.142
16.0953	21691.4	332.141
16.0787	21425.7	332.141
16.062	20333.2	332.141
16.0454	19799.1	332.141
16.0288	21579.5	332.141
16.0121	20632.2	332.141
15.9955	22765.5	332.141
15.9789	22789.3	332.142
15.9623	20504.5	332.142
15.9457	21867.1	332.141
15.929	22865.5	332.141
15.9124	22785.6	332.141
15.8958	23233.5	332.141
15.8791	22260.2	332.142
15.8625	22786.8	332.141
15.8459	23110	332.141
15.8293	22766.4	332.141
15.8126	22878.2	332.141
15.796	22962.2	332.142
15.7794	22024.2	332.142
15.7627	24383.1	332.141
15.7461	23715	332.141
15.7295	22742.1	332.141
15.7128	22658.8	332.141
15.6962	24614.3	332.141
15.6796	22759.4	332.141
15.663	26995.3	332.142
15.6463	24225.4	332.142
15.6297	24220	332.141
15.6131	23876.3	332.142
15.5964	25533.9	332.142
15.5798	25653.3	332.141
15.5632	24479.9	332.141
15.5466	25594.3	332.142
15.53	26439.2	332.141
15.5133	25943.5	332.141
15.4967	26223.7	332.141
15.4801	28180.3	332.141
15.4634	26526	332.141
15.4468	28062.6	332.141
15.4302	27256.8	332.142
15.4136	27681.4	332.142
15.3969	28877.8	332.141
15.3803	29397.4	332.141
15.3637	27816.6	332.142
15.347	28370.1	332.141
15.3304	28379.1	332.141
15.3138	28744.5	332.141
15.2971	30549.4	332.142
15.2805	28140.5	332.141
15.2639	29125.8	332.141
15.2473	30076.4	332.142
15.2306	30760.7	332.142
15.214	31478.2	332.141
15.1974	31810.4	332.141
15.1807	30965.3	332.141
15.1641	31505.6	332.141
15.1475	32008.6	332.142
15.1309	31995.2	332.141
15.1142	32599.4	332.141
15.0976	32419.7	332.142
15.081	32770.3	332.141
15.0644	32035.4	332.141
15.0477	32902.3	332.142
15.0311	33434.9	332.142
15.0145	33355.3	332.142
14.9979	34801	332.142
14.9812	34947.1	332.141
14.9646	34434.8	332.141
14.948	36670.8	332.142
14.9313	37684.1	332.141
14.9147	36069.7	332.142
14.8981	36503.4	332.141
14.8814	35952.5	332.141
14.8648	36462.2	332.141
14.8482	37490.8	332.142
14.8316	37244.1	332.142
14.8149	37418.1	332.142
14.7983	37464.5	332.141
14.7817	37523.9	332.141
14.765	36191.5	332.142
14.7484	37588.1	332.141
14.7318	35891.6	332.141
14.7152	36513.2	332.141
14.6985	34125.8	332.141
14.6819	36068.2	332.142
14.6653	40057.6	218.212
14.6487	50836.6	218.212
14.632	65287.2	218.212
14.6154	78728.9	218.212
14.5988	94638.1	218.212
14.5822	111690	218.212
14.5655	134694	218.213
14.5489	147702	218.213
14.5323	161252	218.213
14.5156	174537	218.213
14.499	174498	218.213
14.4824	173645	218.213
14.4657	166146	218.213
14.4491	151156	218.213
14.4325	130014	218.213
14.4159	110632	218.213
14.3992	82655.4	218.212
14.3826	54939.6	218.212
14.366	42291.3	332.142
14.3493	46223.2	332.141
14.3327	46996.9	332.142
14.3161	51115.5	332.142
14.2995	53153.6	332.142
14.2828	55265.8	332.142
14.2662	57968.9	332.142
14.2496	58981.6	332.142
14.233	61027	332.142
14.2163	63399	332.142
14.1997	65876.7	332.142
14.1831	65896.7	332.142
14.1664	69021.1	332.142
14.1498	65468.7	332.142
14.1332	67698.4	332.142
14.1166	68633.2	332.142
14.0999	70581.8	332.142
14.0833	73150.1	332.142
14.0666	74757.5	332.142
14.05	73177.8	332.142
14.0334	73703	332.142
14.0168	76708.2	332.142
14.0001	79668.8	332.142
13.9835	82142.8	332.142
13.9669	85580	332.142
13.9502	82471.8	332.142
13.9336	86390.2	332.142
13.917	88854.3	332.142
13.9003	90507.8	332.142
13.8837	90240.4	332.142
13.8671	90819.8	332.142
13.8505	95723.5	332.142
13.8338	100008	332.142
13.8172	96244.6	332.142
13.8006	101838	332.142
13.7839	103140	332.142
13.7673	111706	332.142
13.7507	109076	332.142
13.7341	113250	332.142
13.7174	114985	332.142
13.7008	115293	332.142
13.6842	121226	332.142
13.6676	126206	332.142
13.6509	130840	332.142
13.6343	127850	332.142
13.6177	133257	332.142
13.601	138896	332.142
13.5844	142108	332.142
13.5678	149532	332.142
13.5512	152185	332.142
13.5345	155116	332.142
13.5179	159360	332.142
13.5013	159852	332.142
13.4846	163819	332.142
13.468	171793	332.142
13.4514	171915	332.142
13.4348	178678	332.142
13.4181	187325	332.142
13.4015	191521	332.142
13.3849	197229	332.142
13.3682	199787	332.142
13.3516	206241	332.142
13.335	209788	332.142
13.3184	219638	332.142
13.3017	223377	332.142
13.2851	227272	332.142
13.2685	236899	332.142
13.2519	242710	332.142
13.2352	250559	332.142
13.2186	258289	332.142
13.202	264401	332.142
13.1853	278235	332.142
13.1687	285492	332.143
13.1521	298490	332.142
13.1355	305756	332.142
13.1188	316647	332.142
13.1022	326098	332.142
13.0856	339470	332.142
13.0689	356138	332.143
13.0523	369407	332.143
13.0357	382928	332.142
13.0191	392634	332.143
13.0024	416213	332.143
12.9858	419294	332.143
12.9692	445245	332.143
12.9525	466060	332.143
12.9359	489279	332.143
12.9193	462784	332.145
12.9027	291906	332.152
12.886	305715	332.152
12.8694	327731	332.152
12.8528	341824	332.152
12.8362	350739	332.145
12.8195	362128	332.145
12.8029	377429	332.145
12.7863	393896	332.144
12.7696	419936	332.145
12.753	435239	332.145
12.7364	450529	332.144
12.7198	467079	332.144
12.7031	480325	332.139
12.6865	503492	332.139
12.6699	477101	332.139
12.6532	546105	332.142
12.6366	573562	332.144
12.62	594597	332.144
12.6034	630825	332.144
12.5867	652615	332.144
12.5701	687660	332.144
12.5535	707707	332.144
12.5368	734992	332.144
12.5202	757187	332.144
12.5036	772288	332.144
12.487	777188	332.144
12.4703	791485	332.144
12.4537	798155	332.144
12.4371	791103	332.144
12.4205	805284	332.144
12.4038	773067	332.144
12.3872	760240	332.144
12.3706	731045	332.144
12.3539	698859	332.144
12.3373	672989	332.144
12.3207	609515	332.144
12.3041	570432	332.145
12.2874	459826	332.139
12.2708	452814	332.139
12.2542	443947	332.145
12.2375	384654	332.145
12.2209	333976	332.152
12.2043	472531	332.145
12.1877	427295	332.143
12.171	346996	332.143
12.1544	264742	332.143
12.1378	200187	332.143
12.1212	133825	332.142
12.1045	90577.9	332.142
12.0879	54604.1	332.142
12.0713	32281.4	130.16
12.0546	30049.8	130.159
12.038	33302.8	130.16
12.0214	30746	130.16
12.0048	32893	130.16
11.9881	33584	130.16
11.9715	32459.9	130.16
11.9549	32406.5	130.16
11.9382	34024.4	130.16
11.9216	35426.2	130.16
11.905	35900.8	130.16
11.8883	35496.5	130.16
11.8717	35388.7	130.16
11.8551	34670.7	130.16
11.8385	35097	130.16
11.8218	37595.1	130.16
11.8052	40991.7	130.16
11.7886	37604.4	130.16
11.7719	39145.3	130.16
11.7553	38017.6	130.16
11.7387	42016.6	130.16
11.7221	41021.4	130.16
11.7055	43510.2	130.16
11.6888	41451.7	130.16
11.6722	45170.2	130.16
11.6556	45194	130.16
11.6389	46090.3	130.16
11.6223	46060.3	130.16
11.6057	46024.4	130.16
11.5891	48317.6	130.16
11.5724	49110.1	130.16
11.5558	49512.4	130.16
11.5392	51788.7	130.16
11.5225	55354.4	130.16
11.5059	54100.9	130.16
11.4893	52588.9	130.16
11.4726	57130.7	130.16
11.456	58570.7	130.16
11.4394	60725.9	130.16
11.4228	62133.7	130.16
11.4061	62879.7	130.16
11.3895	63199.7	130.16
11.3729	67817.1	130.16
11.3562	67159.6	130.16
11.3396	72802.8	130.16
11.323	73600.6	130.16
11.3064	75628.8	130.16
11.2898	80659.3	130.16
11.2731	79088.3	130.16
11.2565	84662.2	130.16
11.2399	87568.4	130.16
11.2232	87091.3	130.16
11.2066	92090	130.16
11.19	99298.7	130.16
11.1734	99778.1	130.16
11.1567	104202	130.16
11.1401	101119	130.16
11.1235	112486	130.16
11.1068	112395	130.16
11.0902	111069	130.16
11.0736	115972	130.16
11.0569	120491	130.16
11.0403	125358	130.16
11.0237	121041	130.16
11.0071	125723	130.16
10.9904	129305	130.16
10.9738	130693	130.16
10.9572	131983	130.16
10.9405	127790	130.16
10.9239	128098	130.16
10.9073	127995	130.16
10.8907	123625	130.16
10.8741	126553	130.16
10.8574	127981	130.16
10.8408	125457	130.16
10.8242	124370	130.16
10.8075	118705	130.16
10.7909	121784	130.16
10.7743	122435	130.16
10.7577	118536	130.16
10.741	114838	130.16
10.7244	115326	130.16
10.7078	115076	130.16
10.6911	111560	130.16
10.6745	108974	130.16
10.6579	106180	130.16
10.6412	102101	130.16
10.6246	103540	130.16
10.608	98926.8	130.16
10.5914	100272	130.16
10.5747	99076.3	130.16
10.5581	99430.3	130.16
10.5415	91151.5	130.16
10.5248	96986.5	130.16
10.5082	93353.5	130.16
10.4916	89122.4	130.16
10.475	85880.8	130.16
10.4584	90110.3	130.16
10.4417	90278.9	130.16
10.4251	87714.6	130.16
10.4085	86032.6	130.16
10.3918	80982.9	130.16
10.3752	78629.4	130.16
10.3586	79628.8	130.16
10.342	75539.9	130.16
10.3253	76619	130.16
10.3087	75196.5	130.16
10.2921	71385.8	130.16
10.2754	72824.7	130.16
10.2588	70087.9	130.16
10.2422	67741.2	130.16
10.2255	67868.2	130.16
10.2089	63090.6	130.16
10.1923	64419.5	130.16
10.1757	62048.2	130.16
10.159	58088.1	130.16
10.1424	56522.8	130.16
10.1258	56981.7	130.16
10.1091	55252.6	130.16
10.0925	50117	130.16
10.0759	48298.8	130.16
10.0593	46917.8	130.16
10.0427	45839.8	130.16
10.026	41073.8	130.16
10.0094	38267.6	130.16
9.99277	36573.5	130.16
9.97613	34496.9	130.16
9.9595	33483.6	130.16
9.94287	32335.1	130.16
9.92625	29633	130.16
9.90962	29788.4	130.16
9.89298	28261	130.16
9.87637	27981.1	130.16
9.85973	27553.5	130.16
9.8431	27793.6	130.16
9.82648	26281.4	130.159
9.80985	26751.3	130.16
9.79322	26307	130.16
9.7766	27295.9	130.16
9.75997	27636	130.16
9.74333	26175.2	130.16
9.72672	28778.2	130.16
9.71008	26874.2	130.16
9.69345	29802	130.16
9.67683	27414.6	130.16
9.6602	27208.4	130.16
9.64357	26730.6	130.159
9.62695	28030.1	130.16
9.61032	26949.1	130.16
9.59368	27984.5	130.16
9.57705	27957.6	130.16
9.56043	26389.6	130.16
9.5438	26229.9	130.16
9.52717	24738.2	130.16
9.51055	26234	130.16
9.49392	24333.5	130.159
9.47728	27013.7	130.16
9.46067	24310.3	130.16
9.44403	27112.9	130.16
9.4274	23485.1	130.159
9.41078	24599.2	130.16
9.39415	23842.6	130.16
9.37752	22985.3	130.16
9.3609	24788.4	130.16
9.34427	23214.6	130.16
9.32763	24333.1	130.16
9.31102	22660.6	130.16
9.29438	23276.6	130.16
9.27775	21993.2	130.159
9.26113	23009.3	130.16
9.2445	22174.6	130.16
9.22787	22927.5	130.16
9.21123	21862.4	130.16
9.19462	22143.6	130.159
9.17798	20764.2	130.16
9.16135	21747.6	130.16
9.14473	21647.3	130.16
9.1281	20952.9	130.16
9.11147	21995.9	130.16
9.09485	22697.1	130.16
9.07822	21226.8	130.16
9.06158	19786.9	130.16
9.04497	19820.6	130.16
9.02833	19880.6	130.16
9.0117	18555.7	130.16
8.99508	20347.6	130.159
8.97845	20619.6	130.16
8.96182	21014.4	143.002
8.9452	20586.1	143.002
8.92857	20609	130.16
8.91193	20670.8	130.16
8.89532	19051.6	143.002
8.87868	20052.4	130.16
8.86205	19108.4	130.16
8.84542	19132	130.16
8.8288	20329.7	143.002
8.81217	20100.2	143.002
8.79553	19680.6	143.002
8.77892	19183.2	143.002
8.76228	19511.8	143.002
8.74565	19188.7	143.002
8.72903	19646.4	143.002
8.7124	18928.1	143.002
8.69577	20094.8	143.002
8.67915	20663.1	143.002
8.66252	20077.1	143.002
8.64588	19180.9	143.002
8.62927	19486.7	143.002
8.61263	20249.1	143.002
8.596	19577.8	143.002
8.57938	19958.9	143.002
8.56275	20361.8	143.002
8.54612	20306.2	143.002
8.5295	18490.2	143.002
8.51287	19080.2	143.002
8.49623	20749	143.002
8.4796	19591.1	143.002
8.46298	19918.9	143.002
8.44635	21350.7	143.002
8.42972	19617.3	143.002
8.4131	18039.9	143.002
8.39647	20745.2	143.002
8.37983	19378.7	143.002
8.36322	20837.3	143.002
8.34658	20292.5	143.002
8.32995	20096.3	143.002
8.31333	20534.2	143.002
8.2967	19171.8	143.002
8.28007	20012.4	143.002
8.26345	20524.6	143.002
8.24682	20101.6	143.002
8.23018	20717.1	143.002
8.21357	20726	143.002
8.19693	21701.1	143.002
8.1803	19414.2	143.002
8.16368	21540.3	143.002
8.14705	20711.3	143.002
8.13042	20604.6	143.002
8.11378	22279.2	143.002
8.09717	21181.1	143.002
8.08053	19836.5	143.002
8.0639	20223	143.002
8.04728	21781.6	143.002
8.03065	20385.2	143.002
8.01402	20680.2	143.002
7.9974	20193.4	143.002
7.98077	21741.4	143.002
7.96413	20786.5	143.002
7.94752	21456.5	143.002
7.93088	21832.5	143.002
7.91425	21936.1	143.002
7.89763	20163.3	143.002
7.881	22174.9	143.002
7.86437	22924.2	143.002
7.84775	21358.8	143.002
7.83112	22513.5	143.002
7.81448	23034.7	143.002
7.79787	20796.4	143.002
7.78123	21957.2	143.002
7.7646	21683.4	143.002
7.74797	21789.3	143.002
7.73135	22257.8	143.002
7.71472	21918.5	143.002
7.69808	21799.5	143.002
7.68147	21011.2	143.002
7.66483	21732.4	143.002
7.6482	20915.8	143.002
7.63158	21007.2	143.002
7.61495	20077.6	143.002
7.59832	21395.7	143.002
7.5817	21563.6	143.002
7.56507	20104	143.002
7.54843	23182.8	143.002
7.53182	21194.3	143.002
7.51518	20924.2	143.002
7.49855	22028.4	143.002
7.48193	22630.2	143.002
7.4653	19858.9	143.002
7.44867	19348.8	143.002
7.43205	21429.4	143.002
7.41542	20719.2	143.002
7.39878	20280.7	143.002
7.38215	20369.6	143.002
7.36553	21737.1	143.002
7.3489	20019.4	143.002
7.33227	22866.9	143.002
7.31565	22337.2	143.002
7.29902	21705.1	143.002
7.28238	21502.4	143.002
7.26577	20660.7	143.002
7.24913	20473.6	143.002
7.2325	19940.4	143.002
7.21588	20894.2	143.002
7.19925	21098.4	143.002
7.18262	20608.5	143.002
7.166	20643.6	143.002
7.14937	21859.1	143.002
7.13273	20231.1	143.002
7.11612	20925.7	143.002
7.09948	20885.2	143.002
7.08285	21633.6	143.002
7.06623	21372.9	143.002
7.0496	21431.8	143.002
7.03297	19693.6	143.002
7.01633	19785.2	143.002
6.9997	21295.2	143.002
6.98307	20025.7	143.002
6.96645	21282.2	143.002
6.94982	21055.3	143.002
6.93318	21213.6	143.002
6.91657	22311.6	143.002
6.89993	20237.2	143.002
6.8833	19044.6	143.002
6.86668	22133.4	143.002
6.85005	20037.3	143.002
6.83342	19716.6	143.002
6.8168	21294	143.002
6.80017	21038	143.002
6.78353	21646.7	143.002
6.76692	21306.2	143.002
6.75028	21232	143.002
6.73365	20685.4	143.002
6.71703	20980	143.002
6.7004	20915.6	143.002
6.68377	20972.1	143.002
6.66715	21368.1	143.002
6.65052	20983.1	143.002
6.63388	21160	143.002
6.61725	21843.8	143.002
6.60063	19448.6	143.002
6.584	19840.6	143.002
6.56737	20794.2	143.002
6.55075	20743.3	143.002
6.53412	21125.1	143.002
6.51748	20550.6	143.002
6.50087	18556.8	143.002
6.48423	20889.3	143.002
6.4676	19565.8	143.002
6.45098	22350.4	143.002
6.43435	20790.1	143.002
6.41772	21059.4	143.002
6.4011	20452.7	143.002
6.38447	20663.2	143.002
6.36783	21205.2	143.002
6.35122	20196.4	143.002
6.33458	20431.8	143.002
6.31795	19026.7	143.002
6.30133	20485.9	143.002
6.2847	19744.7	143.002
6.26807	20244.8	143.002
6.25143	20942.9	143.002
6.23482	20034.7	143.002
6.21818	20221.9	143.002
6.20155	19732.1	143.002
6.18493	19366.9	143.002
6.1683	21907.9	143.002
6.15167	20760.9	143.002
6.13505	21786	143.002
6.11842	21637	143.002
6.10178	21916.1	143.002
6.08517	19746.8	143.002
6.06853	21073.7	143.002
6.0519	21416.2	143.002
6.03528	19539.5	143.002
6.01865	20677.3	143.002
6.00202	19176.3	143.002
5.9854	20294.6	143.002
5.96877	22755.7	143.002
5.95213	19922	143.002
5.93552	19391.5	143.002
5.91888	22300	143.002
5.90225	20359.7	143.002
5.88562	20385.8	143.002
5.869	20221.1	143.002
5.85237	19652.3	143.002
5.83573	19569.6	143.002
5.81912	20379.9	143.002
5.80248	19710.8	143.002
5.78585	19983.3	143.002
5.76923	19666.2	143.002
5.7526	19207.4	143.002
5.73597	19004.3	143.002
5.71935	20406.6	143.002
5.70272	19255.1	143.002
5.68608	18700.5	143.002
5.66947	19396.3	143.002
5.65283	18896.3	143.002
5.6362	20397.8	143.002
5.61958	19419.4	143.002
5.60295	19981.8	143.002
5.58632	20876	143.002
5.5697	18487.2	143.002
5.55307	18820	143.002
5.53643	19223.8	143.002
5.5198	20344.6	143.002
5.50318	19865.1	143.002
5.48655	20405.3	143.002
5.46992	18274.9	143.002
5.4533	18579.5	143.002
5.43667	19237.2	143.002
5.42003	19231.2	143.002
5.40342	19828.6	143.002
5.38678	20446.4	143.002
5.37015	22359.1	143.002
5.35353	21100.8	143.002
5.3369	20075.4	143.002
5.32027	19448.8	143.002
5.30365	19406.9	143.002
5.28702	19350.1	143.002
5.27038	19497	143.002
5.25377	19176	143.002
5.23713	18786.1	143.002
5.2205	19991.6	143.002
5.20388	19190.9	143.002
5.18725	21939.3	143.002
5.17062	20250.6	143.002
5.15398	19842.4	143.002
5.13737	18927.3	143.002
5.12073	18885.6	143.002
5.1041	19076	143.002
5.08748	19446	143.002
5.07085	17751.7	143.002
5.05422	19677.4	143.002
5.0376	18130.5	143.002
5.02097	19867.4	143.002
5.00433	18254.3	143.002
4.98772	21981.6	143.002
4.97108	19676.4	143.002
4.95445	19221.6	143.002
4.93783	18456.9	143.002
4.9212	20152.3	143.002
4.90457	19207.4	143.002
4.88795	19485.5	143.002
4.87132	18088.4	143.002
4.85468	18448.3	143.002
4.83807	20060.3	143.002
4.82143	18770.4	143.002
4.8048	19320.7	143.002
4.78817	20566.8	143.002
4.77155	18123.6	143.002
4.75492	17195.5	143.002
4.73828	19686.6	143.002
4.72167	18202	143.002
4.70503	18917.9	143.002
4.6884	19111.3	143.002
4.67178	17025.4	143.002
4.65515	17324.9	143.002
4.63852	17637.2	143.002
4.6219	19171.5	143.002
4.60527	19373.6	143.002
4.58863	19307.8	143.002
4.57202	18841.4	143.002
4.55538	18079.8	143.002
4.53875	18473.1	143.002
4.52213	16309.8	143.002
4.5055	17085.7	143.002
4.48887	18044	143.002
4.47225	16976	143.002
4.45562	17748.2	143.002
4.43898	18089.8	143.002
4.42235	16811.2	143.002
4.40573	16569.2	143.002
4.3891	17529	143.002
4.37247	18799.5	143.002
4.35585	17701.2	143.002
4.33922	19025.7	143.002
4.32258	17400.2	143.002
4.30597	17747.5	143.002
4.28933	18335.5	143.002
4.2727	18495.1	143.002
4.25608	16982.1	143.002
4.23945	16219.3	143.002
4.22282	17698	143.002
4.2062	16887.8	143.002
4.18957	17101.3	143.002
4.17293	17157.9	143.002
4.15632	17598	143.002
4.13968	16981.4	143.002
4.12305	18621.2	143.002
4.10643	16237	143.002
4.0898	16152.3	143.002
4.07317	15638.3	143.002
4.05653	16090.7	143.002
4.03992	16827.3	143.002
4.02328	16538.8	143.002
4.00665	16203.6	143.002
3.99003	17344.1	143.002
3.9734	17020.7	143.002
3.95677	16926.2	143.002
3.94015	15744.2	143.002
3.92352	16858.7	143.002
3.90688	15403.9	143.002
3.89027	14885.8	143.002
3.87363	16866.3	143.002
3.857	14675.1	143.002
3.84038	15577.5	143.002
3.82375	15523.2	143.002
3.80712	13463.2	143.002
3.7905	15684.5	143.002
3.77387	14564.1	143.002
3.75723	15219.6	143.002
3.74062	14830.4	143.002
3.72398	14026.2	143.002
3.70735	13850.4	143.002
3.69072	13663.2	143.002
3.6741	12637.7	143.002
3.65747	13027.8	143.002
3.64083	13943.2	143.002
3.62422	13170.9	143.002
3.60758	13448.7	143.002
3.59095	12367.6	143.002
3.57433	12112.8	143.002
3.5577	12199	143.002
3.54107	11692.3	143.002
3.52445	10822.2	143.002
3.50782	10758.5	143.002
3.49118	9281.45	143.002
3.47457	9528.73	143.002
3.45793	9137.64	143.002
3.4413	8855.61	143.002
3.42468	8037.89	143.002
3.40805	7540.22	143.002
3.39142	7997.5	143.002
3.3748	6459.46	143.002
3.35817	6166.71	143.002
3.34153	5971.58	143.002
3.3249	6141.27	143.002
3.30828	4963.03	143.002
3.29165	5082.64	143.002
3.27502	4555.49	143.002
3.2584	4470.25	162.077
3.24177	4577.84	162.077
3.22513	7224.24	162.077
3.20852	8101.91	162.076
3.19188	8721.26	162.077
3.17525	9500.57	162.077
3.15863	10151	162.077
3.142	10804.6	162.077
3.12537	10127.9	162.077
3.10875	9252.29	162.077
3.09212	8164.47	162.077
3.07548	6666.03	162.077
3.05887	4788.84	162.076
3.04223	4580.68	202.181
3.0256	3576.93	143.002
3.00898	3324.68	143.002
2.99235	2878.77	143.002
2.97572	2666.53	132.065
2.95908	3102.64	143.002
2.94247	2839.14	143.002
2.92583	3070.06	132.066
2.9092	3017.73	132.066
2.89258	2734.06	132.065
2.87595	3680.76	132.066
2.85932	2384.47	132.066
2.8427	2399.46	132.066
2.82607	2471.56	132.066
2.80943	3058.49	113
2.79282	2833.81	113
2.77618	3022.49	113.001
2.75955	3117.27	113
2.74293	2977.89	113
2.7263	2736.48	113
2.70967	3558.88	113
2.69305	2885.9	113
2.67642	3851.9	113
2.65978	3361.35	118.087
2.64317	3641.6	113
2.62653	3984.81	113
2.6099	3294.68	118.086
2.59327	3446.71	118.087
2.57665	3701.82	118.087
2.56002	3552.68	194.118
2.54338	4147.01	194.118
2.52677	4940.63	194.118
2.51013	5639.32	202.181
2.4935	8543.84	202.181
2.47688	9966.73	202.181
2.46025	11835.8	202.181
2.44362	17124.6	202.181
2.427	22087.7	202.181
2.41037	23108.8	202.181
2.39373	24011.1	202.181
2.37712	24111.3	202.181
2.36048	16258.8	202.181
2.34385	13653.5	142.949
2.32723	13732.2	142.949
2.3106	14546.2	142.949
2.29397	11576.6	142.949
2.27735	8372.46	142.949
2.26072	6186.42	164.93
2.24408	5780.33	215.101
2.22745	6657.28	226.952
2.21083	9294.09	226.952
2.1942	12452.8	226.953
2.17758	15139.7	226.953
2.16092	17317.6	226.953
2.14428	18558.1	226.953
2.12765	19144.7	226.953
2.11103	19896.4	226.952
2.0944	21028.7	226.953
2.07777	18865.4	226.953
2.06115	16105.9	226.953
2.04452	11133.6	226.952
2.02788	9422.51	127.025
2.01127	14999.4	127.024
1.99463	25984.4	127.025
1.978	33336.1	127.025
1.96137	31732.2	127.025
1.94475	23253.3	127.025
1.92812	17106.7	143.002
1.91148	16336.8	143.002
1.89487	17835.4	143.002
1.87823	18179.1	143.002
1.8616	18513	143.002
1.84498	15084.5	143.002
1.82835	17668.6	143.002
1.81172	18134.7	143.002
1.7951	17214.5	143.002
1.77847	18048.3	143.002
1.76183	17212.1	143.002
1.74522	18473	143.002
1.72858	18699.8	143.002
1.71195	18504.2	143.002
1.69533	17113.8	143.002
1.6787	18483.2	143.002
1.66207	17689.6	143.002
1.64545	18248	143.002
1.62882	17934.4	143.002
1.61218	18102	143.002
1.59555	17231.1	143.002
1.57893	17409.3	143.002
1.5623	16839	143.002
1.54567	18727.8	143.002
1.52905	17390.9	143.002
1.51242	18311.4	143.002
1.49578	18525.5	143.002
1.47917	18701	143.002
1.46253	17711	143.002
1.4459	15580.9	143.002
1.42928	16468.3	143.002
1.41265	16740.1	143.002
1.39602	18095.1	143.002
1.3794	17124.6	143.002
1.36277	15835.4	143.002
1.34613	18300.7	143.002
1.32952	17555.1	143.002
1.31288	16382.2	143.002
1.29625	17627.6	143.002
1.27963	16857.4	143.002
1.263	17569.6	143.002
1.24637	15657.7	143.002
1.22973	18335.5	143.002
1.21312	15971.7	143.002
1.19648	16969	143.002
1.17985	17132.7	143.002
1.16323	17060	143.002
1.1466	15777	143.002
1.12997	18487.1	143.002
1.11335	16908.2	143.002
1.09672	16681.3	143.002
1.08008	17237.4	143.002
1.06347	16790.8	143.002
1.04683	17683.1	143.002
1.0302	16916.6	143.002
1.01358	17649.1	143.002
0.99695	16120.7	143.002
0.980317	17333.1	143.002
0.9637	16801.7	143.002
0.947067	17860.2	143.002
0.930433	17270.6	143.002
0.913817	17706.8	143.002
0.897183	17648.3	143.002
0.88055	16206.2	143.002
0.863917	18304.7	143.002
0.8473	17807.3	143.002
0.830667	15843.3	143.002
0.814033	16493.5	143.002
0.797417	17670.8	143.002
0.780783	16065.6	143.002
0.76415	17891.1	143.002
0.747533	17440.6	143.002
0.7309	16349.2	143.002
0.714267	18069.4	143.002
0.69765	16780.5	143.002
0.681017	17245	143.002
0.664383	16678	143.002
0.647767	17446.4	143.002
0.631133	17487.3	143.002
0.6145	16867.3	143.002
0.597883	17323.9	143.002
0.58125	16388.3	143.002
0.564617	17127	143.002
0.548	17813.9	143.002
0.531367	16513.8	143.002
0.514733	15466.8	143.002
0.4981	16254	143.002
0.481483	16766.8	143.002
0.46485	16817.3	143.002
0.448217	17628.1	143.002
0.4316	15774.2	143.002
0.414967	16404.7	143.002
0.398333	16973.3	143.002
0.381717	15834.1	143.002
0.365083	16409.2	143.002
0.34845	16129.3	143.002
0.331833	15983.1	143.002
0.3152	15061.4	143.002
0.298567	15813.5	143.002
0.28195	16592.5	143.002
0.265317	15486.7	143.002
0.248683	15651.8	143.002
0.232067	14421.6	143.002
0.215433	16540.6	143.002
0.1988	14819.7	143.002
0.182183	14803.8	143.002
0.16555	15163.3	143.002
0.148917	14220.3	143.002
0.132283	14439.8	143.002
0.115667	13469.5	143.002
0.0990333	13435.8	143.002
0.0824	16107.4	143.002
0.0657833	15891.6	143.002

## Sheet: Log Phase basepeak chromatogram
Table S8. Raw metabolomics data exported from LC-MS analysis of log-phase harvested MSM-CIP grown SGO1 cells. Each row corresponds to a mass spectrometry scan.
Retention time	Base peak intensity	z-axis	tooltip
29.9901	22580.3	816.639
29.9568	21712.3	816.638
29.8737	20498.4	772.613
29.8903	20842	772.613
29.9402	21882.9	772.613
29.9069	20832.8	772.612
29.8404	20300.2	772.612
29.9235	21077.3	772.612
29.9734	22644.8	772.612
29.7739	18811.9	772.612
29.8238	18713.9	772.612
29.857	19840.3	772.612
29.8071	18579.9	772.612
29.4746	13694.5	772.611
29.4081	12819	728.587
29.3416	11977.3	728.587
29.3582	12565.8	728.587
29.4413	13277.3	728.587
29.3915	12647.1	728.586
29.458	13483.4	728.586
29.1088	8596.67	728.586
29.2085	9772.59	728.586
29.3249	11210.5	728.586
29.0755	8857.46	728.586
29.2252	10622.4	728.586
29.2584	11200.9	728.586
29.1753	9377.21	728.586
29.4247	13224.4	728.586
29.1919	9729.26	728.586
29.3748	13145.2	728.586
29.3083	11792.1	728.586
29.1254	9052.32	728.585
29.0589	7957.55	728.585
29.2917	10949.1	728.585
29.142	9104.42	728.585
26.0492	74969.7	708.489
26.0326	71070.8	708.488
29.7074	18017.9	702.535
29.6243	17036.2	702.535
29.5577	16271.1	702.535
29.4912	14439.4	702.534
29.5245	14420.1	702.534
29.7406	19331	702.534
29.275	10930	684.561
29.2418	9909.79	684.561
29.0921	8575.07	684.56
29.1587	9330.31	684.56
26.1157	94312.3	664.463
26.1324	94611.1	664.463
26.0825	86256	664.463
26.0991	92685.9	664.463
26.0658	80132.7	664.462
29.6575	19148.6	658.509
29.5079	14471.1	658.509
29.5744	16312.5	658.509
29.6741	18804.8	658.509
29.724	19099	658.509
29.6076	17260.5	658.509
29.5411	15517.1	658.508
29.591	17582.1	658.508
29.6908	19130.8	658.508
29.6409	18269.1	658.508
29.7573	20079.3	658.508
29.7905	18898.3	658.508
27.8783	11857.7	634.451
27.9116	12045.2	634.45
26.2321	88037.1	620.437
26.1822	95472.8	620.437
26.2155	91762.5	620.437
26.2488	81007.6	620.437
26.149	94569.9	620.437
26.1656	96340.4	620.437
26.1989	95197.9	620.437
27.8949	12426.4	590.426
27.9947	12210.6	590.425
27.9781	12495.5	590.425
27.9448	12937.3	590.425
28.0446	10701.6	590.425
27.9614	12832.6	590.424
27.9282	13683.5	590.424
26.2986	69845.6	576.411
26.282	72205.5	576.411
26.3153	62217.2	576.411
26.2654	75831.1	576.41
26.3485	52371.3	576.41
26.3651	47029.7	576.41
26.3319	59298.1	576.41
26.5148	15962.9	576.409
28.028	11346.6	546.399
26.3984	37904.6	532.384
26.3818	42809.9	532.384
26.4317	29164.3	532.384
26.415	36671.6	532.384
26.4483	27330.5	532.384
26.4649	24415.2	532.384
26.4815	19508.1	532.384
26.4982	17699.2	532.383
27.6788	12595.6	507.202
27.2464	15020.6	507.202
27.313	14598	507.202
27.3462	15282.2	507.202
27.6289	13046	507.202
28.427	9988.62	507.202
28.4436	9787.28	507.202
27.1799	15427.1	507.202
27.6122	13540	507.202
27.3628	14442.9	507.202
27.4626	13715.5	507.202
27.7952	12224.1	507.202
27.2963	15509.6	507.202
27.2298	15712.7	507.202
27.5624	13711.4	507.202
28.0113	11872.4	507.202
27.1134	14408.1	507.202
27.1966	14677.6	507.202
27.5457	13571.5	507.202
27.8118	11489.9	507.202
28.7097	8480.81	507.202
27.5291	14101.7	507.202
27.3296	14857.3	507.202
27.5956	12605.2	507.202
27.7619	12450.3	507.202
27.5125	14765.1	507.202
27.3961	14833.5	507.202
27.712	13015.9	507.202
27.1467	15586.9	507.201
28.2774	10552.1	507.201
28.7263	9101.06	507.201
27.0469	14104.5	507.201
27.2132	15540.1	507.201
27.4792	14365	507.201
28.1942	11171.4	507.201
28.9924	7744.96	507.201
27.13	15132.5	507.201
27.2631	14381.2	507.201
28.3272	10346.6	507.201
27.446	13742.7	507.201
27.3795	14639.2	507.201
28.2109	10775.2	507.201
28.5268	10188.2	507.201
28.56	9809.35	507.201
27.8451	11931.7	507.201
28.2607	10734.1	507.201
22.258	19162.5	449.197
18.8326	16092.3	449.197
21.2271	17792.9	449.197
18.8659	15258.7	449.197
18.949	18724.7	449.197
20.9444	15445	449.197
21.1938	17596.3	449.197
18.9989	14217.1	449.197
20.9111	15724.9	449.197
18.8825	17935.8	449.197
18.9657	15877.8	449.197
20.8945	16473.2	449.197
28.5767	10453.2	449.197
21.094	16755.9	449.197
18.8493	15052.8	449.197
26.5647	15845.7	449.197
29.0256	7912.55	449.197
18.9158	17971.8	449.197
20.9943	16852.5	449.197
21.0275	16488.3	449.197
24.6525	21165.2	449.197
24.6691	20421.4	449.197
24.9517	19812.1	449.197
18.8992	16501.9	449.197
24.719	20256.7	449.197
24.8853	20473	449.197
18.9324	16573.1	449.197
24.6026	20291.8	449.197
27.1633	14559.7	449.197
20.961	14897.4	449.197
21.1273	16351.9	449.197
27.7785	13016.5	449.197
21.0608	15548.9	449.197
21.2437	16775.9	449.197
21.2603	17335.2	449.197
22.2747	17901.8	449.197
24.3864	21871.9	449.197
24.5693	21015.7	449.197
24.3698	20550.9	449.197
24.7689	19839.6	449.197
24.8021	20872.8	449.197
24.8354	20601.7	449.197
25.1513	19562.4	449.197
27.7453	12208.8	449.197
20.9776	15275.5	449.197
24.4862	21173.8	449.197
24.5194	20470.6	449.197
24.6358	19928.5	449.197
25.0349	21404.2	449.197
25.1014	18582.4	449.197
27.6621	13515.1	449.197
27.8284	12427.5	449.197
24.5361	20533	449.197
28.0612	11356.5	449.197
24.3199	21172.9	449.197
24.3365	20483.8	449.197
24.6857	20022.6	449.197
25.118	19507.7	449.197
26.548	15333.8	449.197
27.0137	14895.7	449.197
21.1606	16233.8	449.197
23.6714	20668.5	449.197
24.5859	20715.8	449.197
24.7522	19668.7	449.197
26.5813	15003.2	449.197
26.9638	14991.7	449.197
18.9823	15660.2	449.197
20.9278	15373.5	449.197
24.403	21502.1	449.197
24.6192	21190.7	449.197
25.2012	19052.6	449.197
25.2178	19635.4	449.197
28.0945	11365.9	449.197
28.8594	8305.54	449.197
21.1772	16144.1	449.196
24.7855	19742.3	449.196
27.8617	12241	449.196
28.9425	8166.48	449.196
21.1439	16784.3	449.196
24.4197	21691.7	449.196
24.852	20729.8	449.196
25.1347	20178.1	449.196
25.1845	19561.2	449.196
27.6954	12564.2	449.196
24.8187	20129.9	449.196
24.9019	20205.7	449.196
27.2797	15245.7	449.196
28.1444	10568.3	449.196
28.6598	9914.19	449.196
21.0774	16012.1	449.196
24.3033	19995.8	449.196
24.985	20416.6	449.196
28.3439	11403.2	449.196
23.688	21432.8	449.196
24.5028	20933.6	449.196
24.7023	21997.1	449.196
24.9351	21540.4	449.196
25.0848	18731	449.196
27.0802	15236.1	449.196
28.161	11860.7	449.196
28.4935	9872.08	449.196
28.743	9771.11	449.196
28.7929	9249.02	449.196
21.2104	17207.5	449.196
24.4363	21606.4	449.196
26.5314	14907.1	449.196
28.3938	10533.4	449.196
24.5527	18314.7	449.196
28.4104	10429.1	449.196
24.8686	20059.4	449.196
25.0183	19621.6	449.196
26.9804	14286.4	449.196
26.997	15658.1	449.196
27.4127	15377.3	449.196
28.2275	11746.4	449.196
24.4529	20946.5	449.196
25.1679	20103.8	449.196
27.0968	14067.7	449.196
28.5102	10210	449.196
24.4695	22069.2	449.196
25.0016	19503.2	449.196
27.0303	14550.8	449.196
27.7286	12653.1	449.196
24.9684	20761.5	449.196
27.4958	13401.8	449.196
28.1111	11148.6	449.196
28.4769	10397.4	449.196
28.6432	9373.82	449.196
28.8427	8835	449.196
28.3106	10788.3	449.196
28.8095	8325.98	449.196
28.7596	8768.06	449.196
29.009	7903.02	449.196
28.7762	8922.65	449.196
28.876	8015.84	449.196
28.9092	8691.35	449.196
28.294	10748	449.196
24.7356	21124.3	449.196
28.0778	11090.3	449.196
28.6266	9407.61	449.196
28.6765	9135.85	449.196
27.579	13269.5	449.196
27.0635	14881	449.196
28.9757	8637.56	449.196
25.0681	19184	449.196
25.0515	20389.2	449.196
28.1277	11232.4	449.196
24.9185	19662.1	449.196
24.3531	20777	449.196
27.6455	13004.3	449.196
28.6931	9342.2	449.196
29.0423	7939.31	449.196
27.4293	14271.7	449.196
28.3605	10191.3	449.196
22.4243	111859	415.212
22.4409	112328	415.212
22.3412	58213.2	415.212
22.4742	112403	415.212
22.4908	110138	415.212
22.4077	105196	415.212
22.4576	114224	415.212
22.3744	83676.7	415.212
22.5573	77057.8	415.212
22.391	95561.8	415.212
22.5407	89863.3	415.212
22.5074	106254	415.212
22.5241	95482.4	415.212
22.6072	53138.1	415.212
22.3578	75127.6	415.212
22.6238	45985.7	415.212
22.5739	67420.6	415.212
22.5906	61308.6	415.212
22.2913	23987.5	415.212
22.6571	34187.8	415.212
22.3079	36293.3	415.212
22.6405	37850.7	415.212
22.3245	45563.1	415.212
28.3771	10448	393.315
28.9259	8446.27	393.315
28.2441	10959.4	393.314
28.8926	9056.55	393.314
28.4603	9814.26	393.314
28.1776	11150.2	393.314
28.9591	8747.82	393.314
28.8261	8552.68	393.314
28.5434	9283.24	393.314
28.6099	9100.55	393.314
28.5933	9530.03	393.314
21.8756	320166	393.298
21.6594	330373	393.298
21.8589	352838	393.298
21.676	370851	393.298
21.8423	384442	393.298
21.6927	396980	393.298
21.8257	414716	393.297
21.8922	465247	393.29
21.7093	429884	393.289
21.7592	467265	393.289
21.7758	461622	393.289
21.8091	431450	393.289
21.7425	458347	393.289
21.7259	449080	393.289
21.7924	451694	393.289
21.6428	476737	393.287
21.6262	394170	393.287
21.6095	307866	393.287
21.9088	443889	393.287
21.9254	389163	393.287
21.5929	231779	393.287
21.9421	339776	393.287
21.9587	293850	393.287
21.9753	257980	393.287
21.992	219596	393.287
21.5763	159095	393.287
22.0086	182426	393.287
22.0418	128877	393.287
22.0585	110993	393.287
22.0252	156137	393.287
22.1084	64763.7	393.287
22.125	55792.9	393.287
22.0751	90712.2	393.287
22.0917	80035.4	393.286
22.1416	46306	393.286
22.1749	33792.6	393.286
22.1583	40522.6	393.286
22.2414	18493.8	393.286
22.2081	23839	393.286
22.1915	27971.6	393.286
22.2248	21232.3	393.286
19.8303	428908	390.15
19.5643	423246	390.15
19.8137	453836	390.15
19.5809	469149	390.15
19.7971	470311	390.15
19.847	465920	390.148
19.531	359398	390.148
19.5144	288460	390.148
19.5476	429559	390.148
19.8636	441125	390.148
19.8802	406141	390.148
19.4978	223012	390.148
19.9135	360306	390.148
19.8968	385856	390.148
19.9301	331226	390.148
19.98	272849	390.147
19.9467	318492	390.147
20.0132	232270	390.147
19.9634	287903	390.147
19.9966	258732	390.147
20.0465	200580	390.147
20.1629	127173	390.147
20.0299	219657	390.147
20.0631	185864	390.147
20.1296	143709	390.147
20.0964	163590	390.147
20.1462	130322	390.147
20.0798	176352	390.147
20.1795	112351	390.147
20.2294	93200	390.147
20.113	150546	390.147
20.2626	82982.6	390.147
20.1961	106800	390.147
20.2128	99731.2	390.147
20.246	88361	390.147
20.2793	79397.7	390.147
20.3125	67031.7	390.147
20.379	54166.8	390.147
20.2959	75591	390.147
20.3458	61823.9	390.147
20.3292	67701	390.147
20.3624	57355.2	390.147
20.7948	18686.5	390.147
20.3957	51541.3	390.147
20.6118	27441.2	390.147
20.4123	47586.4	390.147
20.4456	43583.2	390.147
20.4622	42534.9	390.147
20.4788	39511.7	390.147
20.4954	40168.1	390.147
20.5287	33793.2	390.147
20.7449	20602.9	390.147
20.5786	29112.4	390.147
20.6285	26427.2	390.146
20.5952	29793.2	390.146
20.6617	24424.2	390.146
20.7116	22467.4	390.146
20.7282	20992.6	390.146
20.8114	16958	390.146
20.8779	16622.5	390.146
20.5121	36000.6	390.146
20.562	30665.4	390.146
20.695	22485.8	390.146
20.5453	34620.1	390.146
20.7615	20792.6	390.146
20.4289	47332.6	390.146
20.7781	20016.6	390.146
20.8613	16445.2	390.146
20.6451	25376.7	390.146
20.828	16936.1	390.146
20.8446	15524.3	390.146
20.6784	22667.9	390.146
19.664	439396	390.141
19.6807	438953	390.141
19.6973	423498	390.141
19.7139	426866	390.141
19.6474	432670	390.141
19.6308	420319	390.141
19.7306	413058	390.141
19.6142	401839	390.141
19.7472	405097	390.14
19.7638	384271	390.14
19.5975	374140	390.14
19.7804	371162	390.14
12.8964	291947	332.152
12.9131	290187	332.152
12.8798	315695	332.152
12.2313	320906	332.152
12.8632	321732	332.152
12.8465	339885	332.152
12.8299	352243	332.152
12.8133	365572	332.152
12.2479	366966	332.145
12.2645	414310	332.145
12.2812	450447	332.145
12.331	563764	332.145
12.78	398431	332.145
12.7967	382880	332.145
12.3477	601678	332.145
12.7634	419086	332.145
12.3643	632949	332.144
12.5805	629010	332.144
12.6138	585157	332.144
12.7302	451331	332.144
12.6304	556410	332.144
12.3976	690230	332.144
12.3809	680072	332.144
12.5971	616561	332.144
12.4142	709812	332.144
12.5306	697681	332.144
12.7135	467298	332.144
12.7468	429970	332.144
12.4308	722898	332.144
12.4641	734894	332.144
12.4807	730789	332.144
12.4973	711734	332.144
12.514	715635	332.144
12.4474	738369	332.144
12.5472	683719	332.144
12.5639	656990	332.144
12.2147	487378	332.143
12.1814	335762	332.143
12.198	406764	332.143
12.9463	474690	332.143
13.0128	401042	332.143
12.1648	268352	332.143
12.9297	492286	332.143
12.9962	415545	332.143
12.9629	451513	332.143
12.9796	431428	332.143
13.0295	379540	332.143
13.0461	371556	332.143
13.096	336598	332.143
12.1482	203740	332.143
13.0794	346383	332.143
13.1126	316403	332.143
12.1315	146030	332.142
13.0627	364634	332.142
13.2124	258908	332.142
13.1292	314881	332.142
13.1459	302889	332.142
13.2789	231774	332.142
13.1791	281835	332.142
13.2622	237648	332.142
13.2955	224332	332.142
12.1149	98285.9	332.142
13.1625	291159	332.142
13.2456	245131	332.142
13.4452	176478	332.142
13.3121	219070	332.142
13.1957	274731	332.142
13.3288	212333	332.142
13.362	203466	332.142
13.3786	197965	332.142
13.3953	199075	332.142
13.4119	189349	332.142
13.4285	183376	332.142
13.5616	145922	332.142
13.3454	201399	332.142
13.5117	160007	332.142
13.6114	137158	332.142
13.6613	127818	332.142
13.7777	106139	332.142
13.229	253243	332.142
13.4618	174820	332.142
13.4784	167464	332.142
13.4951	165108	332.142
13.6779	125462	332.142
13.5283	154264	332.142
13.6281	135403	332.142
13.7278	117024	332.142
13.6946	122693	332.142
13.7611	108991	332.142
13.8609	99784.1	332.142
12.647	530893	332.142
13.5449	154400	332.142
13.5782	144426	332.142
13.7445	117204	332.142
13.9773	85970.8	332.142
14.3098	54289.8	332.142
12.0983	59938.8	332.142
13.5948	140310	332.142
13.8442	101290	332.142
13.7943	105380	332.142
13.8941	90923.5	332.142
13.9108	89333.9	332.142
13.7112	118432	332.142
13.811	104864	332.142
13.8775	97580.1	332.142
13.6447	129550	332.142
13.944	86106.1	332.142
14.0438	76605.4	332.142
14.1768	67719	332.142
13.8276	98456.3	332.142
14.1934	68046.7	332.142
14.2766	60638.2	332.142
13.9939	81989.9	332.142
14.3431	49239.5	332.142
16.1223	21573.6	332.142
13.9606	85989.8	332.142
14.0936	72854.7	332.142
14.1602	69375.6	332.142
14.2267	62661.3	332.142
14.2433	62667.4	332.142
14.2932	57225	332.142
14.3265	51283.7	332.142
14.3763	41568.4	332.142
15.9394	22090.3	332.142
14.0105	81281.6	332.142
14.393	42954.6	332.142
12.0816	30530.9	332.142
14.0271	76770.5	332.142
14.1103	71720	332.142
14.1435	69426.5	332.142
14.6756	35685.6	332.142
14.7089	36296.9	332.142
15.0414	33512.2	332.142
15.2244	31912	332.142
13.9274	89420.3	332.142
14.077	73881	332.142
14.1269	70890.2	332.142
14.2599	62715.2	332.142
14.9583	36953.4	332.142
15.0581	34033.6	332.142
14.21	64639.2	332.142
14.8419	37582.3	332.142
15.4239	28221.1	332.142
15.9061	22396	332.142
14.0604	74440	332.142
14.792	37492.5	332.142
14.8586	36586.4	332.142
15.9227	22744.1	332.142
15.374	28154.3	332.142
14.6424	37042.2	332.142
14.7422	36598.3	332.142
14.7588	37946.3	332.142
14.8918	36308.8	332.142
14.925	36638.3	332.142
15.0082	34814	332.142
15.8895	23008.5	332.142
16.2719	19530.5	332.142
16.3717	18943.7	332.142
14.6091	35545.3	332.142
14.7255	37146.6	332.142
14.9417	37021.1	332.142
15.2576	32553.1	332.142
15.3241	29613.2	332.142
15.4405	28202.8	332.142
15.7398	26132.2	332.142
16.1389	20481.2	332.142
14.7754	37544.6	332.142
14.9084	36445.3	332.142
15.1745	32127.6	332.142
15.3075	30055	332.142
15.7232	25713.6	332.142
15.8396	23361	332.142
16.0391	21317.5	332.142
14.3597	47231.2	332.142
14.6257	35194.2	332.142
14.6923	36727.5	332.142
14.8087	36830.5	332.142
15.5569	25997.1	332.142
15.8729	21780.8	332.142
16.2387	19504	332.142
16.3551	18441.4	332.142
14.8253	36712.1	332.142
15.0747	34151.8	332.142
15.1246	34147.4	332.142
15.1579	33255.6	332.142
15.1911	32462.3	332.142
15.4073	29008.3	332.142
16.0225	20774.5	332.142
14.8752	36493.2	332.141
14.9916	34864.8	332.141
15.108	34181.7	332.141
15.5403	25358.5	332.141
15.7897	25164.2	332.141
16.1721	20399.2	332.141
16.2553	20315.4	332.141
16.4715	17916.2	332.141
15.2077	32182.6	332.141
15.2743	30274.1	332.141
15.3906	28180.3	332.141
15.0248	35744.1	332.141
15.0913	35202.8	332.141
15.3574	29000.1	332.141
16.089	21274.3	332.141
16.1888	19101.8	332.141
16.3384	18625.1	332.141
15.2909	30310.8	332.141
15.5237	26343.9	332.141
16.0059	21044.9	332.141
16.1555	20398.5	332.141
16.3883	19817.3	332.141
14.659	35755.5	332.141
15.5902	25523.7	332.141
15.6401	24227.5	332.141
15.6733	25069.6	332.141
15.7731	23843	332.141
16.0724	21776.9	332.141
15.4904	26789.6	332.141
16.4382	17246	332.141
16.5047	18143.4	332.141
16.5712	18612.4	332.141
14.9749	37101.7	332.141
15.1412	32665.5	332.141
15.241	32009.8	332.141
15.507	26537.6	332.141
15.6567	24650.3	332.141
15.6899	24300.1	332.141
15.823	23719.7	332.141
16.3218	19345.2	332.141
16.6876	16181.3	332.141
15.4738	27390.2	332.141
15.6234	25445.2	332.141
16.2054	19601.9	332.141
16.538	18271.6	332.141
15.3407	30353.3	332.141
15.6068	24807.4	332.141
15.7564	24730	332.141
15.9726	21649.8	332.141
16.4049	17491	332.141
16.4881	18260.8	332.141
15.5736	25742.4	332.141
15.8562	22416.8	332.141
15.956	23305.2	332.141
16.0558	21074.7	332.141
16.4548	17828.1	332.141
16.1056	20243.2	332.141
16.2885	19807.4	332.141
15.9893	22329.8	332.141
16.3052	19600.9	332.141
15.7066	25436.1	332.141
15.4572	27082.9	332.141
15.8063	24467.4	332.141
16.4216	18571.8	332.141
12.3144	469727	332.139
12.6636	464878	332.139
12.2978	466394	332.139
12.6803	499839	332.139
12.6969	475943	332.139
23.8377	58670.3	330.337
24.0871	52571.4	330.337
23.9707	61419.1	330.337
23.7712	50213.3	330.337
23.8044	55757.1	330.337
23.9042	61957.1	330.337
23.8211	59216	330.337
24.004	57152.8	330.337
24.0206	58571.4	330.337
23.7545	43828.3	330.337
23.9375	62234.2	330.337
23.9541	60488.2	330.337
24.0539	56437.5	330.337
24.1203	49316.9	330.337
24.137	46410	330.337
23.7878	53302.9	330.337
23.8709	63421.7	330.337
23.8876	64200.3	330.337
23.9873	63655.1	330.337
24.0372	55672.9	330.337
23.8543	62159.4	330.337
23.9208	62236.4	330.337
24.1536	43513.1	330.337
24.1869	40125.4	330.337
24.0705	54784.3	330.337
24.2367	32591.9	330.337
24.1037	50695.5	330.337
23.7047	26412.1	330.337
24.1702	44082.4	330.337
23.7379	37158	330.337
23.7213	33098.3	330.337
24.2866	22669.6	330.337
24.2201	33870.1	330.336
24.2035	38434.1	330.336
24.2534	29523.3	330.336
24.27	26290.3	330.336
21.543	170586	302.306
21.4599	182355	302.306
21.5264	180364	302.306
21.5596	163647	302.306
21.41	171571	302.306
21.4266	177310	302.306
21.5098	181433	302.306
21.4433	181923	302.306
21.4765	183779	302.306
21.3934	155397	302.306
21.4931	183057	302.306
21.3601	126916	302.306
21.3767	143492	302.306
21.3435	102867	302.306
21.3269	81027.2	302.306
21.3102	56395.8	302.306
21.277	20941.7	302.306
21.2936	36418.8	302.305
25.6335	328264	284.332
25.6169	328471	284.332
25.6501	324308	284.332
25.6834	319914	284.332
25.6003	330475	284.332
25.6668	325034	284.332
25.7167	305371	284.332
25.7333	298831	284.332
25.7	311039	284.332
25.4839	314268	284.332
25.7499	299044	284.332
25.5005	324542	284.332
25.5504	336214	284.332
25.7998	262310	284.332
25.5171	323722	284.332
25.5337	329859	284.332
25.5836	331249	284.332
25.4506	302289	284.332
25.4672	309792	284.332
25.567	330430	284.332
25.833	246490	284.332
25.8497	228390	284.332
25.7832	279858	284.332
25.8164	257812	284.332
25.434	292626	284.332
25.7665	286859	284.332
25.3508	203302	284.332
25.8829	204059	284.332
25.3342	176920	284.332
25.3675	227707	284.332
25.4174	277673	284.332
25.8663	208821	284.332
25.8995	189007	284.332
25.9162	163273	284.332
25.3841	251356	284.332
25.4007	261999	284.332
25.3176	148458	284.332
25.2843	89293.4	284.332
25.9328	153516	284.332
25.9661	118566	284.332
25.3009	114072	284.332
25.9494	139145	284.332
25.9993	94462.2	284.332
26.0159	81669.9	284.332
25.9827	103978	284.331
25.2677	61845.9	284.331
25.2511	39118.2	284.331
25.2344	21980.5	284.331
19.3814	321636	274.28
19.3647	352877	274.28
19.132	367780	274.28
19.3481	370594	274.28
19.1486	392612	274.28
19.3148	413197	274.28
19.3315	394926	274.28
19.1818	432911	274.28
19.1652	416417	274.28
19.265	445869	274.28
19.1985	447137	274.28
19.2982	425814	274.28
19.2484	453110	274.28
19.2816	434646	274.28
19.2151	454098	274.279
19.2317	453454	274.279
19.0987	438932	274.276
19.398	487129	274.276
19.4146	434335	274.275
19.4312	381565	274.275
19.0821	351949	274.275
19.4479	334725	274.275
19.4645	283802	274.275
19.0654	244876	274.275
19.4811	234395	274.275
19.0488	152829	274.275
19.0322	77944	274.275
19.0156	34452.1	274.275
19.1153	469510	274.274
23.2723	321975	256.305
22.7735	338102	256.305
23.2557	355498	256.305
22.7901	407294	256.305
23.2391	382514	256.305
22.8067	456173	256.305
23.2225	409447	256.304
23.2058	442158	256.304
23.1892	470156	256.304
22.8566	507519	256.301
23.1227	520932	256.301
23.0063	601654	256.301
23.0562	579073	256.301
23.0728	564032	256.301
22.8732	536596	256.301
22.8899	565774	256.301
22.9065	585570	256.301
23.0395	602330	256.301
23.1061	540326	256.301
22.9564	606805	256.301
22.973	613197	256.301
23.0229	591315	256.301
22.9398	603855	256.301
22.9897	611557	256.301
23.0894	550663	256.301
22.7568	481915	256.301
22.9231	601422	256.301
22.7402	372215	256.301
23.3056	441225	256.301
23.3222	389873	256.301
23.3555	297805	256.301
23.3388	345978	256.301
22.707	160957	256.301
22.7236	259162	256.301
23.3721	258235	256.301
23.3887	224964	256.301
23.4053	194106	256.301
23.422	160192	256.301
23.4386	137239	256.3
22.6903	86012.8	256.3
23.4885	86242.2	256.3
23.4719	99293	256.3
23.5051	72775.6	256.3
23.4552	114832	256.3
22.6737	40212.8	256.3
23.5384	53684.4	256.3
23.5716	38953.6	256.3
23.5217	62867.9	256.3
23.6049	29368.3	256.3
23.5883	32146.4	256.3
23.555	48000.9	256.3
23.6215	27193.2	256.3
23.6381	22228.8	256.3
23.6548	22234.1	256.299
22.84	474919	256.299
22.8234	430915	256.299
23.1393	487600	256.299
23.1726	437852	256.299
23.1559	460557	256.299
23.2889	467820	256.297
16.8705	110982	246.244
16.9038	106197	246.244
16.9204	102333	246.244
16.8539	110277	246.244
16.804	95775.8	246.244
16.8207	100471	246.244
16.8872	107975	246.244
16.7874	82092.7	246.244
16.937	97013.3	246.244
16.9703	79686.5	246.244
16.7708	68191.6	246.244
16.8373	108830	246.244
16.9537	88980	246.244
16.9869	72038.8	246.244
17.0036	62729.1	246.244
16.7541	51084	246.244
17.0867	22928	246.244
17.0534	35778.6	246.244
17.0368	44337.1	246.244
17.0202	51830.2	246.244
17.1033	18853.5	246.243
16.7375	35310.3	246.243
17.0701	28780.5	246.243
16.7209	22070.5	246.243
2.07155	18295.9	226.953
2.20458	9441.6	226.953
2.18795	10842.8	226.953
2.05493	16108.3	226.953
2.08818	19641.1	226.953
2.13807	16833.9	226.953
2.17133	12474.8	226.952
2.10482	19155.7	226.952
2.12145	17385.9	226.952
2.22122	7272.63	226.952
2.0383	10501.9	226.952
2.1547	13908	226.952
14.4429	66269.4	218.213
14.4262	59421.9	218.213
14.4595	72125.7	218.213
14.4761	75754.3	218.212
14.5759	46091.2	218.212
14.5093	73135.9	218.212
14.5426	60816	218.212
14.526	68466.8	218.212
14.4927	76558.3	218.212
14.5592	53533.7	218.212
14.4096	50219.5	218.212
14.5925	37610.9	218.212
2.23783	5598.96	215.101
2.25447	5298.5	215.101
2.38748	35275.8	202.181
3.00273	5488.01	202.181
3.06923	5727.09	202.181
2.47063	19689.6	202.181
2.37087	28267.7	202.181
2.40412	40448.5	202.181
2.42075	35220.9	202.181
2.5704	4277.39	202.181
2.48727	15324.6	202.181
2.35423	18316.6	202.181
2.454	25739.9	202.181
2.50388	10975.1	202.181
3.05262	4810.21	202.181
3.01935	5214.55	202.181
2.43737	31896.9	202.181
2.96947	4965.91	202.181
2.53715	6652.41	202.181
2.55377	5647.39	202.181
2.9861	4404.48	202.181
3.03598	5940.96	202.181
2.52052	9386.08	202.181
2.95285	3416.81	202.181
2.2711	5888.29	164.93
3.1025	6001.75	162.077
3.13575	7075.97	162.077
3.2189	4092.91	162.077
3.18563	6291.1	162.077
3.15238	6766.21	162.077
3.20227	5608.55	162.077
3.23552	4490.07	162.077
3.11912	5893.84	162.076
3.169	5648.45	162.076
3.08587	5193.9	162.076
26.6811	24293.5	149.024
26.8806	23013	149.024
26.9471	17105.2	149.024
26.5979	18009.9	149.024
26.9305	19119.6	149.024
26.6977	25051.7	149.024
26.9139	18968.8	149.024
26.7476	26817.6	149.024
26.7143	25057	149.024
26.7975	28424.8	149.024
26.8474	26296.4	149.024
26.6146	18136.9	149.024
26.8141	26506	149.024
26.7309	26115.3	149.024
26.7642	28630.2	149.024
26.7808	29602.1	149.023
26.8307	25629	149.023
26.6478	20105.1	149.023
26.864	23410.4	149.023
26.8972	21181.3	149.023
26.6644	21274.5	149.023
26.6312	18833.3	149.023
2.90297	2689.53	143.003
8.40683	19704.4	143.003
3.55145	9594.2	143.002
3.80087	13437.2	143.002
8.17405	22293.7	143.002
9.25487	21469.4	143.002
3.76762	12975.2	143.002
8.27382	20635.6	143.002
1.52283	17732	143.002
1.82213	18836.1	143.002
3.36855	5308.25	143.002
4.54913	17941.6	143.002
8.35695	22383.8	143.002
5.92927	19997.1	143.002
6.71078	20711.1	143.002
7.6752	20407.5	143.002
8.60637	19734.4	143.002
8.70613	21460.4	143.002
3.53482	7962.72	143.002
5.39717	19936.3	143.002
5.94588	20858.8	143.002
6.09553	21593	143.002
7.3759	20737	143.002
7.94125	20479.9	143.002
8.15742	19872.3	143.002
3.30203	4183.72	143.002
4.466	16894	143.002
5.896	19964	143.002
5.99577	20662.5	143.002
6.79392	21040	143.002
9.42115	20408.5	143.002
9.88673	19323.9	143.002
4.79855	17236.5	143.002
6.47798	21331.1	143.002
7.2595	21488.1	143.002
7.7916	20999.7	143.002
8.14078	19361.9	143.002
8.48998	20607.2	143.002
9.37127	19394.5	143.002
0.358867	15324.7	143.002
0.857717	17730	143.002
4.44937	18612.5	143.002
4.58238	17596.7	143.002
4.6489	17591.9	143.002
5.56345	20225.2	143.002
7.1431	22122.5	143.002
7.15973	19770.9	143.002
7.87473	21457.8	143.002
7.99113	22073.1	143.002
8.0244	21095.8	143.002
8.25718	19082.8	143.002
8.3237	20903.7	143.002
9.10522	21730.4	143.002
9.23823	20704.9	143.002
0.2591	16138.5	143.002
0.5584	16718.7	143.002
1.6226	18370.8	143.002
3.43505	5938.13	143.002
3.98378	15400	143.002
4.8817	17931.6	143.002
4.89832	18325.4	143.002
5.67983	20294.7	143.002
7.70847	19097.2	143.002
7.72508	21000.5	143.002
7.82485	19373.8	143.002
0.6748	18514.7	143.002
4.49925	16444.8	143.002
4.5325	17097.7	143.002
4.59902	17863.6	143.002
5.0646	18626.1	143.002
6.52787	21695.7	143.002
7.17637	21405	143.002
7.50892	20738.4	143.002
7.52555	21288.9	143.002
7.54218	22002.8	143.002
8.47335	19660.1	143.002
8.57312	20322.9	143.002
8.93893	20189.3	143.002
0.159333	14025.9	143.002
0.192583	15099.3	143.002
0.242467	15499.8	143.002
0.575033	16260.8	143.002
0.94085	17404.2	143.002
1.30667	18257.6	143.002
1.83877	18310.7	143.002
3.96715	14270.1	143.002
4.06692	15148	143.002
4.3496	18140.2	143.002
5.64658	20924.2	143.002
6.07892	20128.9	143.002
6.51123	20743.9	143.002
8.72277	19926.2	143.002
9.17173	19996.8	143.002
1.10713	17026.4	143.002
1.12377	18256.7	143.002
4.73205	18901.8	143.002
4.74867	17297.1	143.002
5.46368	19767.4	143.002
5.97915	19874.2	143.002
6.14542	20731.7	143.002
6.37822	20818.4	143.002
6.5445	19467.5	143.002
6.64427	20782.1	143.002
6.81055	21070.7	143.002
6.89368	20275.8	143.002
7.05997	19721.6	143.002
8.04102	19947.2	143.002
8.39022	21621	143.002
8.98882	20228.5	143.002
0.0595667	15967.9	143.002
0.741317	18139.4	143.002
1.65585	18911.5	143.002
1.88865	17549.6	143.002
3.88402	13793.3	143.002
3.9339	14078.7	143.002
5.11448	18161.9	143.002
5.31402	19071.3	143.002
5.41378	18744.6	143.002
5.96252	19242.6	143.002
7.42578	21033.4	143.002
7.84148	20933.4	143.002
8.00777	21255.9	143.002
8.05765	21167.3	143.002
8.52323	20599.6	143.002
8.53987	20216.2	143.002
8.75603	20741.3	143.002
8.9223	19924.2	143.002
9.60405	18838.4	143.002
9.83685	19794.6	143.002
9.85348	19687.8	143.002
0.22585	15400.3	143.002
1.25678	17580.7	143.002
1.45632	17749.8	143.002
1.5062	17183.3	143.002
1.57272	18422	143.002
1.58935	18014.3	143.002
1.68912	18521.3	143.002
3.41843	7109.34	143.002
3.65122	9824.08	143.002
4.86507	18075.2	143.002
5.66322	21324.8	143.002
6.49462	19944.3	143.002
6.59438	18248.8	143.002
6.67752	20781.6	143.002
7.12648	20972.1	143.002
7.29277	22105.5	143.002
7.40915	21699.7	143.002
7.57543	22469.3	143.002
7.65858	21706.6	143.002
7.89137	20520.2	143.002
9.1551	19386	143.002
9.47103	19908.4	143.002
9.48767	18578.1	143.002
9.50428	19679.8	143.002
9.82022	18950.3	143.002
9.8701	19250.4	143.002
0.0762	14776.6	143.002
0.425383	16298.7	143.002
0.9076	16766.5	143.002
1.19027	17933.4	143.002
1.63923	17924.9	143.002
1.87202	17755	143.002
3.26878	4252.06	143.002
3.50157	7512.85	143.002
3.90063	14526.8	143.002
5.09787	19010.4	143.002
5.33065	18579.5	143.002
5.51357	19759.5	143.002
6.6609	20358.1	143.002
6.7274	21228.7	143.002
6.76067	21127.2	143.002
6.77728	20347.4	143.002
7.19298	19662.6	143.002
7.9745	22170.1	143.002
8.5066	19772.4	143.002
8.82253	19431.6	143.002
9.28812	20037.8	143.002
9.338	19766.2	143.002
9.70382	18492.5	143.002
9.90337	19227.3	143.002
0.392133	14377.2	143.002
0.708067	17925.7	143.002
0.874333	16920.7	143.002
1.024	17165.3	143.002
1.0905	17474.5	143.002
1.24015	17770.5	143.002
1.38982	18379.3	143.002
1.78888	18704.4	143.002
4.28308	15489.4	143.002
4.93158	17751.8	143.002
4.9482	19233.1	143.002
5.76298	19506.5	143.002
5.8295	20385.2	143.002
6.99345	20832.7	143.002
7.04333	20593.1	143.002
7.27613	19757.5	143.002
7.74172	22015	143.002
8.58975	20487.5	143.002
8.65625	19840.5	143.002
8.68952	19448.2	143.002
8.7394	20117.5	143.002
9.12185	19582.7	143.002
9.30475	19466.6	143.002
9.35463	19749.6	143.002
9.40452	19494.1	143.002
9.5708	19726.6	143.002
9.63732	19470.4	143.002
0.591667	17987.6	143.002
0.774567	17926.2	143.002
1.47295	18377.4	143.002
1.77225	18431.4	143.002
1.8554	18046.5	143.002
3.68448	11995	143.002
3.71773	12269.1	143.002
4.2332	16422.9	143.002
5.13112	19474.2	143.002
5.86275	21550.4	143.002
6.36158	18134	143.002
6.91032	20905.6	143.002
7.01008	20453.1	143.002
7.02672	20389.4	143.002
7.39253	21150.3	143.002
7.64195	21396.6	143.002
7.75835	19131.5	143.002
7.85812	20306.8	143.002
7.908	19192.3	143.002
8.07428	21258.7	143.002
8.22393	20173.2	143.002
8.24055	20672	143.002
8.67288	20148	143.002
9.55417	19700.3	143.002
0.541783	16909.6	143.002
0.924217	16437.9	143.002
1.42307	17078.7	143.002
1.4397	17357.5	143.002
1.53947	17233.8	143.002
1.80552	18559.2	143.002
3.25215	4066.14	143.002
3.48493	8212.8	143.002
3.95053	14732.1	143.002
4.1168	14866.8	143.002
4.18332	16822.4	143.002
4.69878	18562.2	143.002
4.84843	18014.7	143.002
4.91495	19066.5	143.002
5.03135	19424.5	143.002
5.08123	18297.1	143.002
5.19763	18657.4	143.002
5.3639	18938.3	143.002
5.44705	18975.3	143.002
5.4803	19144.3	143.002
5.61333	19831.1	143.002
6.27845	20598.2	143.002
7.59207	20964.2	143.002
7.80823	20666.6	143.002
7.95788	19672.5	143.002
8.4401	18935	143.002
9.43777	20041.7	143.002
9.4544	19133.1	143.002
9.53755	21136.5	143.002
0.292367	15572.4	143.002
0.34225	15790.9	143.002
0.508517	15801.9	143.002
0.624917	16564.4	143.002
0.82445	18085.2	143.002
1.05725	17386.7	143.002
1.35655	18463.4	143.002
1.40643	17140.4	143.002
1.60597	17802.6	143.002
4.66553	19337.5	143.002
4.71542	19261.6	143.002
6.4281	20332.9	143.002
6.56113	18921.7	143.002
6.69415	22044	143.002
7.09322	21485.3	143.002
8.29043	20629.5	143.002
8.55648	19323.7	143.002
9.62068	18086.7	143.002
9.77033	19095.7	143.002
0.10945	13504.4	143.002
0.841083	16825.2	143.002
0.990733	16647.1	143.002
1.00737	17297.1	143.002
1.48958	18648.8	143.002
1.67248	19253.3	143.002
1.90528	17401.6	143.002
3.78425	12702.9	143.002
4.0503	16499.1	143.002
4.63227	19304	143.002
4.83182	17420.6	143.002
5.01472	19848.1	143.002
5.23088	18873.9	143.002
5.28077	18670.6	143.002
5.49693	18236.7	143.002
5.74635	19462.4	143.002
6.0124	18753.2	143.002
6.02903	20320.9	143.002
6.1288	21427.5	143.002
6.17868	20285.2	143.002
6.26182	22085.2	143.002
6.57775	19340.9	143.002
7.22625	20991.3	143.002
7.30938	20123.6	143.002
7.32602	19702.1	143.002
7.92462	20357.5	143.002
8.10753	20793.6	143.002
8.63963	19424.9	143.002
9.67057	19009.5	143.002
0.608283	17096.5	143.002
0.691433	16383	143.002
0.75795	17094.6	143.002
1.72237	17381.1	143.002
1.739	18718	143.002
3.33528	4197.85	143.002
3.56808	9133.74	143.002
3.60133	9395.35	143.002
3.7011	11542.5	143.002
4.10018	15706.8	143.002
4.24983	16145.1	143.002
5.5967	20056	143.002
6.19532	20289	143.002
6.32833	19639.3	143.002
6.44473	19961.4	143.002
7.47567	20326.1	143.002
7.4923	19631.1	143.002
7.60868	20624.1	143.002
7.77497	20447.7	143.002
8.0909	21210.9	143.002
8.30707	20876.8	143.002
8.34032	19867	143.002
9.52092	19269.5	143.002
9.73708	18260.4	143.002
0.126083	13534.4	143.002
0.442017	14587.1	143.002
0.52515	15336.5	143.002
0.64155	17120.5	143.002
1.27342	16663.2	143.002
1.3233	17575.6	143.002
1.55608	18970.2	143.002
3.31867	4334.62	143.002
4.19995	15718.8	143.002
4.21657	16354	143.002
4.68215	17673	143.002
4.78193	18727.3	143.002
5.84612	19034.1	143.002
6.06228	21149.4	143.002
6.29508	20063.7	143.002
6.3117	20431.9	143.002
6.46135	20532	143.002
6.62763	20541.5	143.002
6.86043	18998.9	143.002
7.0766	19832.2	143.002
7.24287	20784.9	143.002
7.69183	20052.4	143.002
8.2073	19986.2	143.002
8.37358	20051.2	143.002
8.42347	20620.7	143.002
9.22162	20429.8	143.002
9.6872	18470.4	143.002
9.80358	17923.9	143.002
0.209217	14844.5	143.002
0.3755	14977.9	143.002
0.724683	18364.7	143.002
0.7912	18199.9	143.002
1.15702	17341.3	143.002
1.33992	17895.2	143.002
3.45168	7148.48	143.002
4.03367	15419.7	143.002
4.41612	16555.1	143.002
5.2974	19907.8	143.002
5.43042	20415.7	143.002
6.34497	19824.6	143.002
6.74403	19588.6	143.002
7.10985	21465.3	143.002
7.35927	20386	143.002
8.90568	19623.8	143.002
0.325617	16662.4	143.002
1.07388	17885.7	143.002
1.14038	17535.4	143.002
1.22353	17273.3	143.002
3.66785	11412.4	143.002
3.8175	13657.1	143.002
4.38285	18089.6	143.002
4.39948	16591.2	143.002
4.81518	18023.1	143.002
4.96483	18421.5	143.002
5.04797	19712.3	143.002
5.21425	17955.9	143.002
5.69647	18596.9	143.002
6.97683	19177.4	143.002
7.44242	20660.6	143.002
7.45903	19740.6	143.002
8.87242	19877.5	143.002
9.38788	19355.4	143.002
1.17365	17254.6	143.002
1.75563	18130	143.002
3.58472	10163	143.002
4.00042	15502.1	143.002
4.36623	17382.4	143.002
4.56577	16453.1	143.002
6.16205	19894.1	143.002
6.8438	19533.8	143.002
7.34265	20586.5	143.002
7.5588	20477.2	143.002
8.12417	20561.2	143.002
9.13847	19437.8	143.002
9.58743	20731.5	143.002
9.78697	18495.7	143.002
0.175967	13828.5	143.002
0.475267	17971.8	143.002
0.4919	14389.9	143.002
0.890967	17581.5	143.002
1.04062	17524.7	143.002
4.43273	17105	143.002
4.51588	17459.6	143.002
5.26413	19376.6	143.002
5.62995	19151.8	143.002
5.72972	21340.2	143.002
5.87938	20153.5	143.002
5.91263	20349.8	143.002
6.04565	20192.7	143.002
6.87705	20924.9	143.002
6.92695	19395.9	143.002
6.9602	19935.9	143.002
7.62532	21772.8	143.002
8.77265	20107.5	143.002
9.02207	20573.9	143.002
3.5182	7831.19	143.002
4.29972	17702.5	143.002
4.48262	17906.9	143.002
4.98147	17990.6	143.002
5.24752	17418.6	143.002
8.19067	19502.9	143.002
8.83917	20024.9	143.002
9.65393	19322.4	143.002
0.275733	16940.1	143.002
0.458633	16397.2	143.002
0.807833	15829.8	143.002
3.35192	5087.8	143.002
3.38517	5603.12	143.002
3.46832	8194.36	143.002
4.01703	16149.4	143.002
4.31633	17109.6	143.002
4.61565	17468.3	143.002
4.7653	17085.1	143.002
6.11217	19400.4	143.002
6.94357	22625.5	143.002
8.623	20984.4	143.002
0.9741	16958.5	143.002
1.29003	18225.1	143.002
1.37318	17967.9	143.002
3.4018	6509.83	143.002
3.61797	9696.26	143.002
3.91727	14031.1	143.002
4.13343	16983.4	143.002
4.15007	15754.5	143.002
4.16668	15115.3	143.002
4.26645	17401.1	143.002
4.99808	17794.5	143.002
5.38053	18651.7	143.002
5.54682	21065.8	143.002
5.58007	17845.8	143.002
6.2452	20179.2	143.002
6.41147	20505.2	143.002
0.1427	13209.8	143.002
5.53018	18883.3	143.002
6.39485	19980.2	143.002
6.61102	19959.9	143.002
0.308983	15932.9	143.002
2.93622	3056.14	143.002
6.82717	18716.9	143.002
9.72045	18901.3	143.002
9.7537	19362.2	143.002
1.70573	17578.8	143.002
3.2854	4668.86	143.002
3.86738	12980.4	143.002
5.14775	18226	143.002
5.81287	19581.4	143.002
6.21193	19535.5	143.002
7.20962	18389.4	143.002
5.7131	18972.9	143.002
0.658183	16353.2	143.002
2.91958	3221.37	143.002
5.16437	18162	143.002
5.181	18942	143.002
0.40875	16580.7	143.002
6.22857	19617.9	143.002
8.45672	19104.5	143.002
0.957483	17132.7	143.002
3.6346	9614.09	143.002
3.75098	11578.9	143.002
3.83413	15067.9	143.002
5.7796	19956.8	143.002
4.08355	16154.9	143.002
4.33297	17806.5	143.002
5.79623	19777.5	143.002
0.0928167	14428.8	143.002
2.88633	3307.05	143.002
5.34728	17683	143.002
1.2069	17272	143.002
2.8697	2767.28	143.002
3.85075	13981.7	143.002
3.73437	10787.9	143.002
2.28772	9160.38	142.949
2.3376	11573.5	142.949
2.32098	10885.7	142.949
2.30435	9530.13	142.948
10.7514	120232	130.16
10.7015	109791	130.16
10.7181	115662	130.16
10.8179	122768	130.16
11.0673	118157	130.16
9.18835	19724.5	130.16
10.7348	118821	130.16
11.1671	103567	130.16
2.60365	4845.56	130.16
10.5851	101570	130.16
10.6683	111359	130.16
10.768	117886	130.16
11.084	117863	130.16
11.5163	54287.5	130.16
8.88905	20556.4	130.16
10.1528	56611.7	130.16
10.8678	129563	130.16
10.901	127357	130.16
2.81982	3681.94	130.16
10.3856	84101.8	130.16
10.4853	92263.1	130.16
10.6516	109358	130.16
10.8844	128539	130.16
11.1006	110863	130.16
11.1505	104589	130.16
2.63692	6466.25	130.16
10.1029	49451.8	130.16
10.186	61770.1	130.16
10.5685	97163.8	130.16
10.7846	120511	130.16
11.0507	121984	130.16
11.217	90692.8	130.16
11.3334	75769.4	130.16
11.7823	40172.6	130.16
9.9865	28139.1	130.16
10.2858	71269.9	130.16
10.502	91187.8	130.16
10.6017	100738	130.16
11.0174	125732	130.16
2.83645	3614.83	130.16
9.00545	22340.6	130.16
10.1694	60603.1	130.16
10.4687	86819.4	130.16
10.8345	128809	130.16
10.9177	128852	130.16
11.0341	122364	130.16
11.1172	111224	130.16
11.1837	98847.2	130.16
11.2336	88710.1	130.16
11.3001	79133	130.16
11.5329	54388.7	130.16
8.95557	20640.1	130.16
9.08858	20543.6	130.16
10.2027	62449.8	130.16
10.3689	77317.2	130.16
10.5186	90777.2	130.16
10.5519	96799.2	130.16
10.6849	113116	130.16
10.8511	125983	130.16
11.2502	85336.9	130.16
11.2669	80452.9	130.16
11.3167	77187	130.16
11.4498	59456.5	130.16
11.616	45874.3	130.16
11.6659	45126.6	130.16
16.671	18245.1	130.16
8.78928	21040	130.16
8.8558	19058.6	130.16
9.32138	19185.3	130.16
10.2193	62696.5	130.16
10.2359	60943	130.16
10.3523	77633.5	130.16
10.4354	87581.5	130.16
10.635	106032	130.16
10.9509	129035	130.16
11.2003	94233.5	130.16
11.3833	67084.8	130.16
11.7324	41078	130.16
9.0387	19527.2	130.16
10.5352	94581.8	130.16
10.6184	103546	130.16
10.9343	130887	130.16
10.9676	130690	130.16
11.1338	105540	130.16
11.483	58647.9	130.16
11.5495	50138.1	130.16
11.5828	48756.9	130.16
11.6493	46167	130.16
9.2715	21005.2	130.16
10.2526	64418.2	130.16
10.3024	74622.6	130.16
10.3357	74126.6	130.16
10.4022	85208.2	130.16
10.9842	127818	130.16
11.2835	80007.3	130.16
11.35	74075	130.16
11.3666	68236.1	130.16
11.3999	64443.8	130.16
11.4664	60723.1	130.16
11.7158	40513.3	130.16
11.8322	38327.5	130.16
11.8821	36739.4	130.16
2.62028	4857.53	130.16
9.07195	20361.8	130.16
9.96987	26248.3	130.16
11.0008	130418	130.16
11.4165	64510.7	130.16
11.4331	61573.4	130.16
11.4997	57353.8	130.16
11.6327	47379.6	130.16
11.6826	43415.6	130.16
11.9652	35738.7	130.16
10.1195	49994.6	130.16
10.3191	78049.8	130.16
18.3172	16213.2	130.16
10.0364	35011.1	130.16
10.053	40814.7	130.16
10.8013	121529	130.16
11.8987	36484.6	130.16
11.9153	33650.6	130.16
17.2696	16543.1	130.16
2.67017	6314.8	130.16
10.0031	29545.5	130.16
10.0863	45410.8	130.16
10.2692	67100.9	130.16
10.4188	84023.8	130.16
10.4521	85859.4	130.16
11.9985	32274.1	130.16
17.3029	16292.1	130.16
18.4003	16013.9	130.16
9.20498	20538.2	130.16
11.7491	41442.2	130.16
17.7518	17062.7	130.16
18.4502	16833.2	130.16
2.58703	4598.18	130.16
9.91998	22009.3	130.16
10.0696	41696.6	130.16
11.8156	37726.8	130.16
11.932	33763.7	130.16
11.9819	34282.9	130.16
10.1362	53559.5	130.16
11.5662	50113.8	130.16
11.799	39911.2	130.16
12.0317	33813.9	130.16
17.2031	16822.7	130.16
17.5357	16805.7	130.16
18.0844	16117.2	130.16
2.7533	5858.87	130.16
11.5994	47392.4	130.16
11.6992	43627.3	130.16
11.7657	40137.7	130.16
11.8655	37221.3	130.16
12.0151	32940.7	130.16
12.0484	33684.3	130.16
17.4858	16406	130.16
17.8516	16756.7	130.16
2.76993	5763.14	130.16
9.05533	21400.3	130.16
18.0511	16929.7	130.16
8.80592	20404.8	130.16
10.0197	35496.9	130.16
17.1532	17230.4	130.16
17.7684	16679.1	130.16
2.72005	5922.38	130.16
11.8488	37370.3	130.16
11.9486	33960.6	130.16
12.065	30571.8	130.16
16.5879	16972	130.16
16.6378	18605.3	130.16
17.1865	18144.6	130.16
17.4193	18753.9	130.16
17.9181	17730.8	130.16
18.2507	17267.4	130.16
18.7329	14926.8	130.16
16.5546	18931.2	130.16
17.6188	16786.6	130.16
18.1842	17368.4	130.16
16.222	19788.5	130.16
17.9347	15122.9	130.16
18.1176	16715	130.16
18.55	16400.3	130.16
18.5998	17359.1	130.16
16.7043	16890.9	130.16
17.4525	17661.3	130.16
17.519	17184.5	130.16
18.6165	16590	130.16
2.65353	6926.45	130.159
9.95325	23089.6	130.159
17.1199	18054.5	130.159
17.8848	17684.2	130.159
18.2174	16581.2	130.159
18.5333	16931.5	130.159
2.70342	7438.61	130.159
2.85308	2929.78	130.159
16.6045	17562.7	130.159
17.1366	16081	130.159
17.3694	16030.2	130.159
17.4026	16878	130.159
17.7851	15875.6	130.159
18.2839	17751.9	130.159
17.4692	16083.4	130.159
17.6853	16031.7	130.159
17.8183	16347	130.159
2.78657	4825.02	130.159
8.97218	18273.3	130.159
9.93662	20739.6	130.159
17.3195	16150.8	130.159
17.6354	16613.4	130.159
18.4834	17104.5	130.159
2.6868	6306.02	130.159
16.5214	17293.1	130.159
17.3361	16657.9	130.159
17.5024	16008.6	130.159
17.7186	16633.7	130.159
17.9015	17169.9	130.159
18.0179	17184.7	130.159
18.1509	17771.3	130.159
18.3338	16917.7	130.159
21.1107	15098.6	130.159
17.7019	17629.5	130.159
18.0678	17095.4	130.159
18.101	15387.1	130.159
21.0442	16347.5	130.159
16.6544	17429.1	130.159
17.6022	16292.1	130.159
18.2673	16695.8	130.159
18.3671	17357	130.159
17.3528	16257.4	130.159
17.386	17248	130.159
17.8017	16172.4	130.159
18.0012	16777.3	130.159
18.3504	16203.8	130.159
18.4169	16378.3	130.159
18.5832	15768	130.159
18.7994	14545.6	130.159
17.2197	15883.1	130.159
17.253	16371.7	130.159
18.1343	15960.3	130.159
18.4336	14874.8	130.159
18.6497	17570.2	130.159
18.816	15993.6	130.159
2.73668	5848.87	130.159
17.1698	16477.6	130.159
2.80318	4021.57	130.159
17.2862	16870.4	130.159
17.4359	15522.9	130.159
17.5855	16546	130.159
17.6521	16976.3	130.159
18.234	15890.4	130.159
17.5689	17111.3	130.159
17.835	15988.4	130.159
18.5001	16512.7	130.159
18.683	15621	130.159
18.7162	15877.6	130.159
17.9513	15926.5	130.159
17.968	16518.3	130.159
18.1675	16216.9	130.159
18.3006	15621.7	130.159
18.6996	16478.3	130.159
18.4668	15830.8	130.159
16.6211	16740.3	130.159
21.0109	15819.2	130.159
17.2363	16402.8	130.159
17.5523	15923.7	130.159
17.8682	15929.3	130.159
18.5167	18137.6	130.159
18.6331	15402.1	130.159
18.7495	14666	130.159
18.7661	14731.9	130.159
17.7352	16594.5	130.159
18.5666	15709.8	130.159
18.2008	16237.3	130.159
18.7827	14546.6	130.159
17.6687	15319.7	130.159
17.9846	15493.8	130.159
18.0345	16065.7	130.159
18.3837	16433.5	130.159
18.6664	15424.6	130.159
2.00505	21640	127.025
1.93853	31019.5	127.025
1.9219	18742.9	127.025
1.95517	47553.9	127.025
1.97178	48179.5	127.025
1.98842	38394	127.025
2.02167	10976	127.025
